# Supplementary material for: Characterizing the degradation of cannabidiol in an e-liquid formulation
Source: Springer Nature journal article supplement (doi:10.1038/s41598-022-23910-6), 2022-11-21
Supplement: MOESM1 [file 41598_2022_23910_MOESM1_ESM-1.pdf]

# Supporting Information

## Characterizing the degradation of cannabidiol in an e-liquid formulation

Adrián Schwarzenberg<sup>1</sup>, Harry Carpenter<sup>1</sup>, Christopher Wright<sup>1</sup>, Omer Bayazeid<sup>1</sup>, and Michał Brokl<sup>1\*</sup>

<sup>1</sup>B.A.T. (Investments) Limited, Southampton SO15 8TL, United Kingdom

\*Corresponding author: [michal\\_brokl@bat.com](mailto:michal_brokl@bat.com)

### Supplementary tables

**Table S1.** List of sodium formate adducts used for mass calibration.

| Mass Calibration                         |                | Mass Calibration Graph |             |             |
|------------------------------------------|----------------|------------------------|-------------|-------------|
| Calibration spectrum: 4.2-9.7s           |                |                        |             |             |
| Calibration mode: hpc8                   |                |                        |             |             |
| Standard deviation: 0.04 mDa<br>0.06 ppm |                |                        |             |             |
| Reference ...                            | Resulting m... | Intensity              | Error [ppm] | Error [mDa] |
| 90.97665                                 | 90.97665       | 801389                 | 0.00        | 0.00        |
| 158.96407                                | 158.96407      | 221493                 | -0.01       | -0.00       |
| 226.95149                                | 226.95150      | 685967                 | 0.04        | 0.01        |
| 294.93892                                | 294.93891      | 37350                  | -0.03       | -0.01       |
| 362.92634                                | 362.92633      | 246528                 | -0.04       | -0.01       |
| 430.91377                                | 430.91381      | 373087                 | 0.10        | 0.04        |
| 498.90119                                | 498.90116      | 246828                 | -0.05       | -0.03       |
| 566.88861                                | 566.88859      | 250970                 | -0.04       | -0.02       |
| 634.87604                                | 634.87606      | 235991                 | 0.03        | 0.02        |
| 702.86346                                | 702.86348      | 251574                 | 0.03        | 0.02        |
| 770.85088                                | 770.85087      | 206959                 | -0.01       | -0.01       |
| 838.83831                                | 838.83827      | 161352                 | -0.05       | -0.04       |
| 906.82573                                | 906.82579      | 91843                  | 0.07        | 0.06        |
| 974.81316                                | 974.81312      | 55441                  | -0.04       | -0.04       |
| 1042.80058                               | 1042.80059     | 31191                  | 0.01        | 0.01        |
| 1110.78800                               | 1110.78800     | 16649                  | -0.00       | -0.00       |
|                                          |                |                        |             |             |

**Table S2.** The 39 standards used to build the mass spectral library.

| <b>Standard</b>             | <b>Molecular weight</b> | <b>Formula</b>                                 | <b>CAS no.</b> |
|-----------------------------|-------------------------|------------------------------------------------|----------------|
| CBCV                        | 286.19                  | C <sub>19</sub> H <sub>26</sub> O <sub>2</sub> | 41408-19-9     |
| CBN                         | 310.19                  | C <sub>21</sub> H <sub>26</sub> O <sub>2</sub> | 521-35-7       |
| Δ8-THC                      | 314.22                  | C <sub>21</sub> H <sub>30</sub> O <sub>2</sub> | 5957-75-5      |
| CBG                         | 316.24                  | C <sub>21</sub> H <sub>32</sub> O <sub>2</sub> | 25654-31-3     |
| CBNM                        | 324.21                  | C <sub>22</sub> H <sub>28</sub> O <sub>2</sub> | 41935-92-6     |
| CBD-HQ                      | 328.2                   | C <sub>21</sub> H <sub>28</sub> O <sub>3</sub> | 137252-25-5    |
| CBDVA                       | 330.18                  | C <sub>20</sub> H <sub>26</sub> O <sub>4</sub> | 31932-13-5     |
| CBGVA                       | 332.2                   | C <sub>20</sub> H <sub>28</sub> O <sub>4</sub> | 64924-07-8     |
| CBDP                        | 342.26                  | C <sub>23</sub> H <sub>34</sub> O <sub>2</sub> | 55824-13-0     |
| (-)-11-nor-9-Carboxy-Δ9-THC | 344.2                   | C <sub>21</sub> H <sub>28</sub> O <sub>4</sub> | 56354-06-4     |
| CBNA                        | 354.18                  | C <sub>22</sub> H <sub>26</sub> O <sub>4</sub> | 2808-39-1      |
| THCA                        | 358.21                  | C <sub>22</sub> H <sub>30</sub> O <sub>4</sub> | 23978-85-0     |
| CBGA                        | 360.23                  | C <sub>22</sub> H <sub>32</sub> O <sub>4</sub> | 25555-57-1     |
| CBGQ                        | 330.22                  | C <sub>21</sub> H <sub>30</sub> O <sub>3</sub> | 1884127-66-5   |
| THCV                        | 286.19                  | C <sub>19</sub> H <sub>26</sub> O <sub>2</sub> | 31262-37-0     |
| CBND                        | 310.19                  | C <sub>21</sub> H <sub>26</sub> O <sub>2</sub> | 39624-81-2     |
| Δ9-THC                      | 314.22                  | C <sub>21</sub> H <sub>30</sub> O <sub>2</sub> | 1972-08-3      |
| CBCQ                        | 328.2                   | C <sub>21</sub> H <sub>28</sub> O <sub>3</sub> | N/A            |
| THCVA                       | 330.18                  | C <sub>20</sub> H <sub>26</sub> O <sub>4</sub> | 39986-26-0     |
| CBE                         | 330.22                  | C <sub>21</sub> H <sub>30</sub> O <sub>3</sub> | 52025-76-0     |
| CBLA                        | 358.21                  | C <sub>22</sub> H <sub>30</sub> O <sub>4</sub> | 40524-99-0     |
| CBDV                        | 286.19                  | C <sub>19</sub> H <sub>26</sub> O <sub>2</sub> | 24274-48-4     |
| CBD                         | 314.22                  | C <sub>21</sub> H <sub>30</sub> O <sub>2</sub> | 13956-29-1     |
| 6α-hydroxy-CBD              | 330.22                  | C <sub>21</sub> H <sub>30</sub> O <sub>3</sub> | 58940-28-6     |
| CBCA                        | 358.21                  | C <sub>22</sub> H <sub>30</sub> O <sub>4</sub> | 185505-15-1    |
| CBDB                        | 300.44                  | C <sub>20</sub> H <sub>28</sub> O <sub>2</sub> | 60113-11-3     |
| CBT (citrin)                | 314.2                   | C <sub>21</sub> H <sub>30</sub> O <sub>2</sub> | 31508-71-1     |
| 7-Carboxy-CBD               | 344.44                  | C <sub>21</sub> H <sub>28</sub> O <sub>4</sub> | 1101886-13-8   |
| CBCVA                       | 330.18                  | C <sub>20</sub> H <sub>26</sub> O <sub>4</sub> | 1628112-69-5   |
| CBDA                        | 358.21                  | C <sub>22</sub> H <sub>30</sub> O <sub>4</sub> | 1244-58-2      |
| 7-Hydroxy-CBD               | 330.22                  | C <sub>21</sub> H <sub>30</sub> O <sub>3</sub> | 1101886-10-5   |
| CBCO                        | 258.4                   | C <sub>17</sub> H <sub>22</sub> O <sub>2</sub> | 55824-09-4     |
| 11-Hydroxy-THC              | 330.22                  | C <sub>21</sub> H <sub>30</sub> O <sub>3</sub> | 34675-49-5     |
| CBC                         | 314.2                   | C <sub>21</sub> H <sub>30</sub> O <sub>2</sub> | 20675-51-8     |
| CBL                         | 314.2                   | C <sub>21</sub> H <sub>30</sub> O <sub>2</sub> | 21366-63-2     |
| CBDM                        | 328.5                   | C <sub>22</sub> H <sub>32</sub> O <sub>2</sub> | 1972-05-0      |
| CBCB                        | 300.4                   | C <sub>20</sub> H <sub>28</sub> O <sub>2</sub> | 2552823-92-2   |
| CBDH                        | 328.5                   | C <sub>22</sub> H <sub>32</sub> O <sub>2</sub> | 2552798-21-5   |
| THCH                        | 328.5                   | C <sub>22</sub> H <sub>32</sub> O <sub>2</sub> | 36482-24-3     |

## Supplementary figures

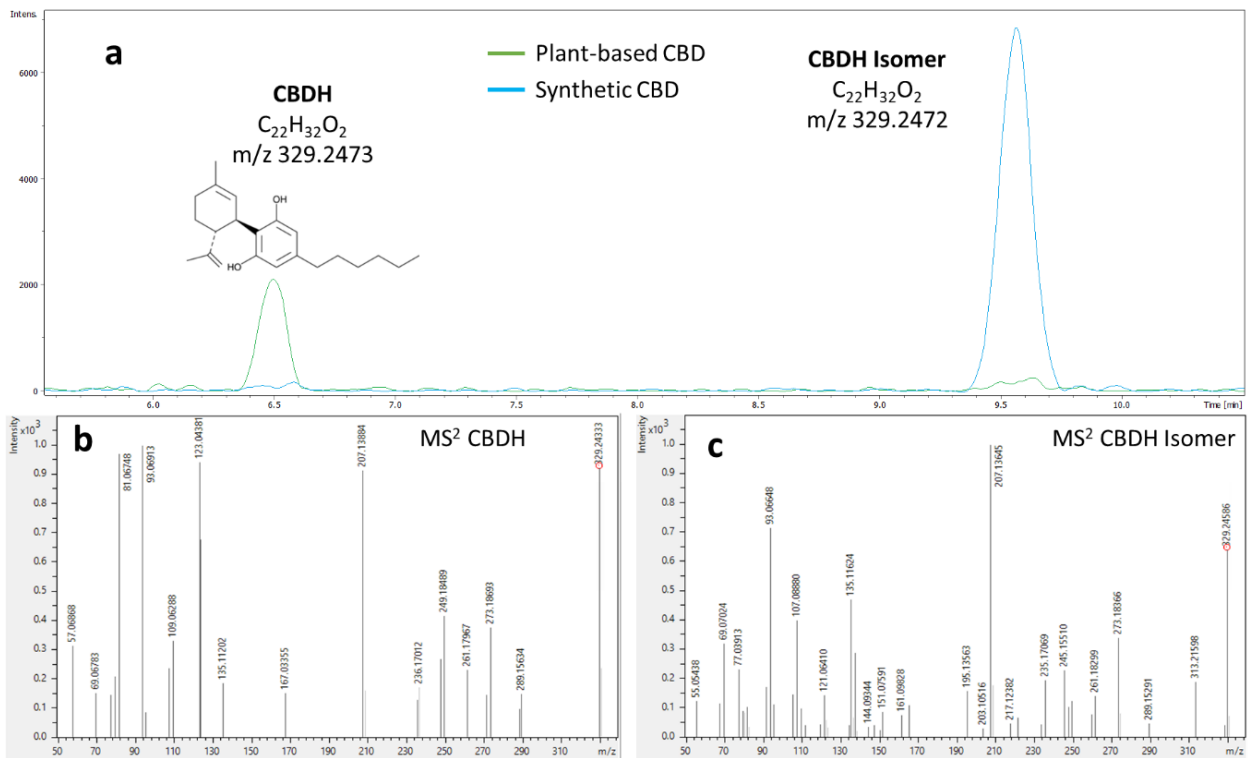

**Figure S1.** CBD source-specific impurities. **a**) High-resolution extraction ion chromatogram (HRXIC) of CBDH found only in plant-based CBD (green trace) and that of CBDH isomer found only in synthetic CBD (blue trace). MS<sup>2</sup> fragmentation pattern of CBDH in plant-based CBD e-liquid (**b**) and CBDH in synthetic CBD e-liquid (**c**).

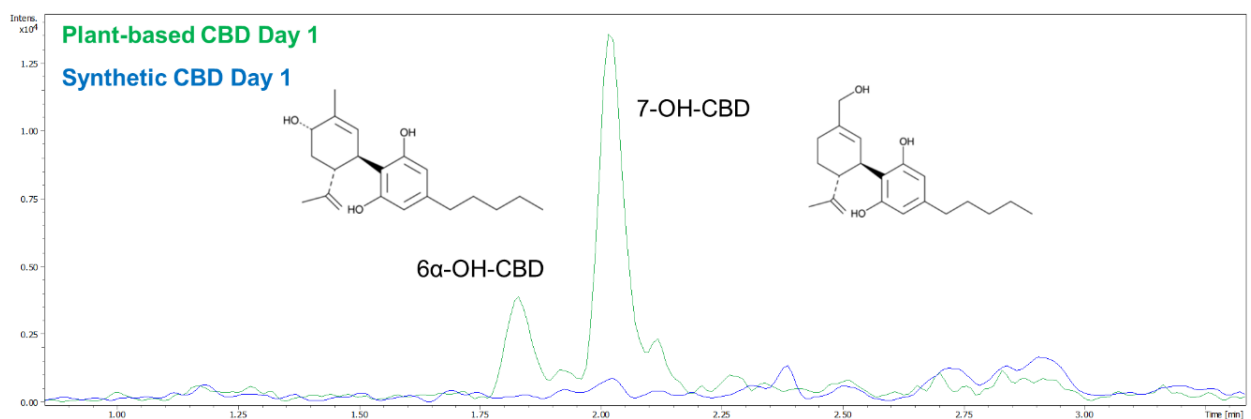

**Figure S2.** 6- $\alpha$ -hydroxy-cannabidiol (6 $\alpha$ -OH-CBD) and 7-hydroxy-cannabidiol (7-OH-CBD) identified only in plant-based CBD e-liquid.

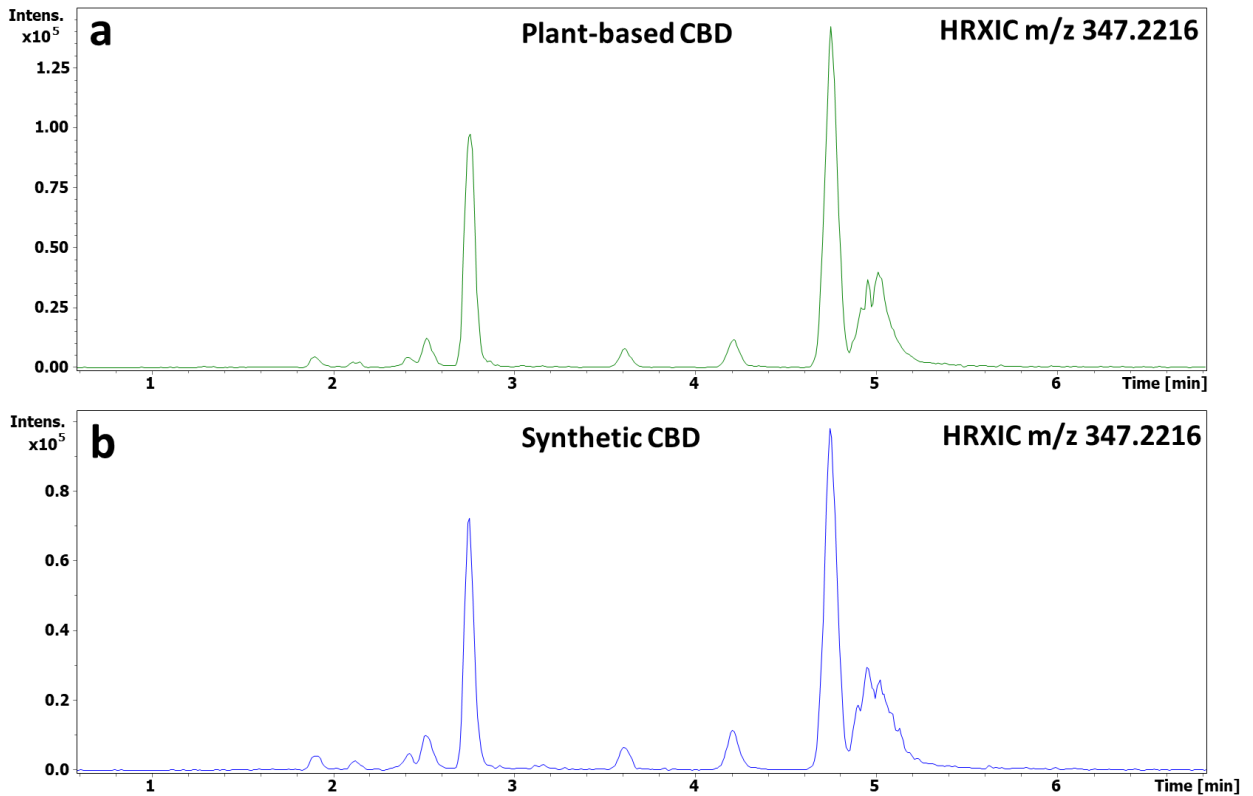

**Figure S3.** HRXIC of m/z 347.2216 ion observed in CBD e-liquid stored for 29 days under stressed conditions. **a)** Plant-based CBD e-liquid formulation; **b)** synthetic CBD e-liquid formulation.

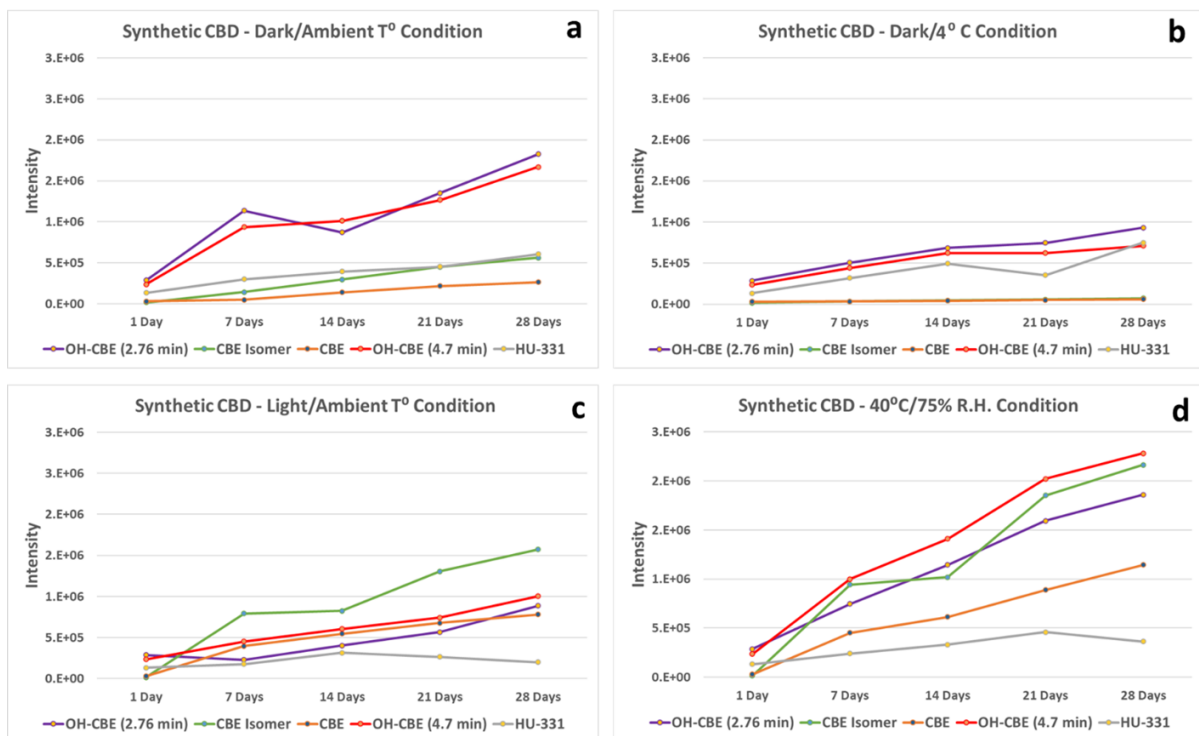

**Figure S4.** Trends in levels of cannabinoids detected in e-liquid formulated with synthetic CBD stored for 29 days under four different conditions. **a)** Ambient dark storage; **b)** 4 °C dark storage; **c)** ambient light storage; **d)** 40 °C/75%RH storage.

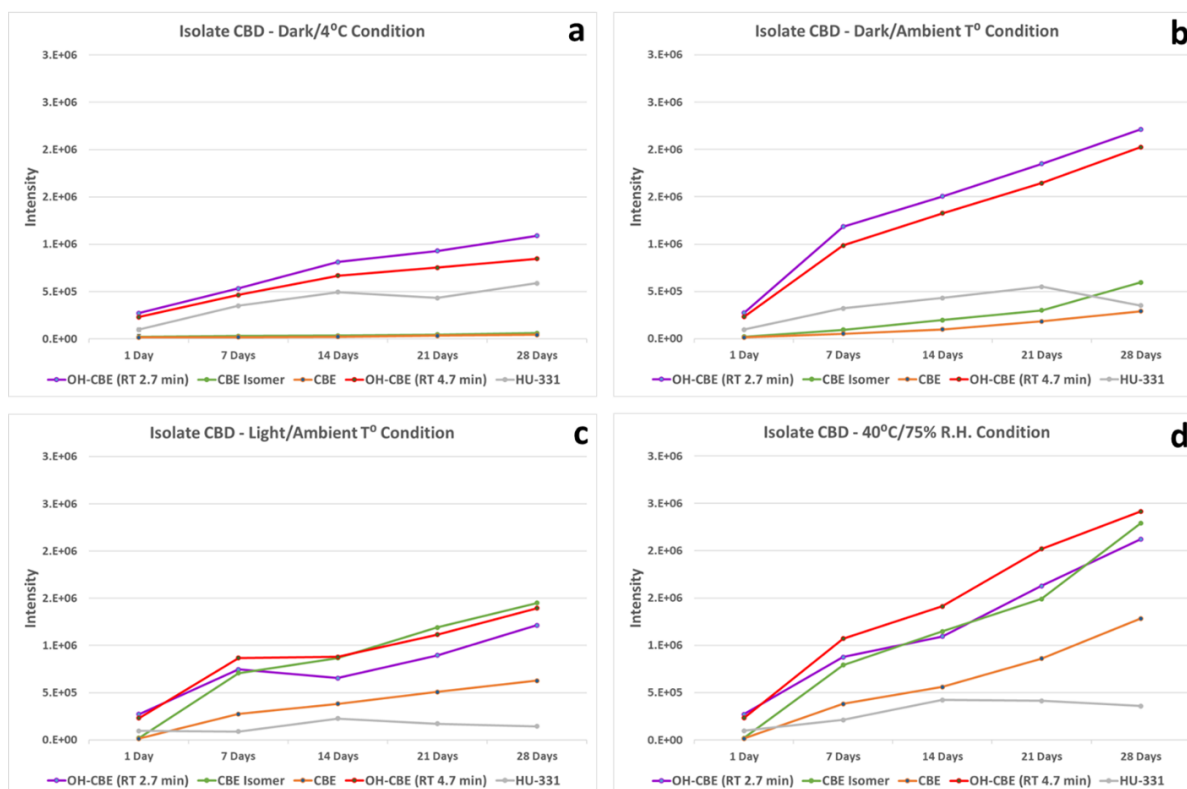

**Figure S5.** Trends in levels of cannabinoids detected in e-liquid formulated with plant-based CBD stored for 29 days under four different conditions. **a)** Ambient dark storage; **b)** 4 °C dark storage; **c)** ambient light storage; **d)** 40 °C/75%RH storage.

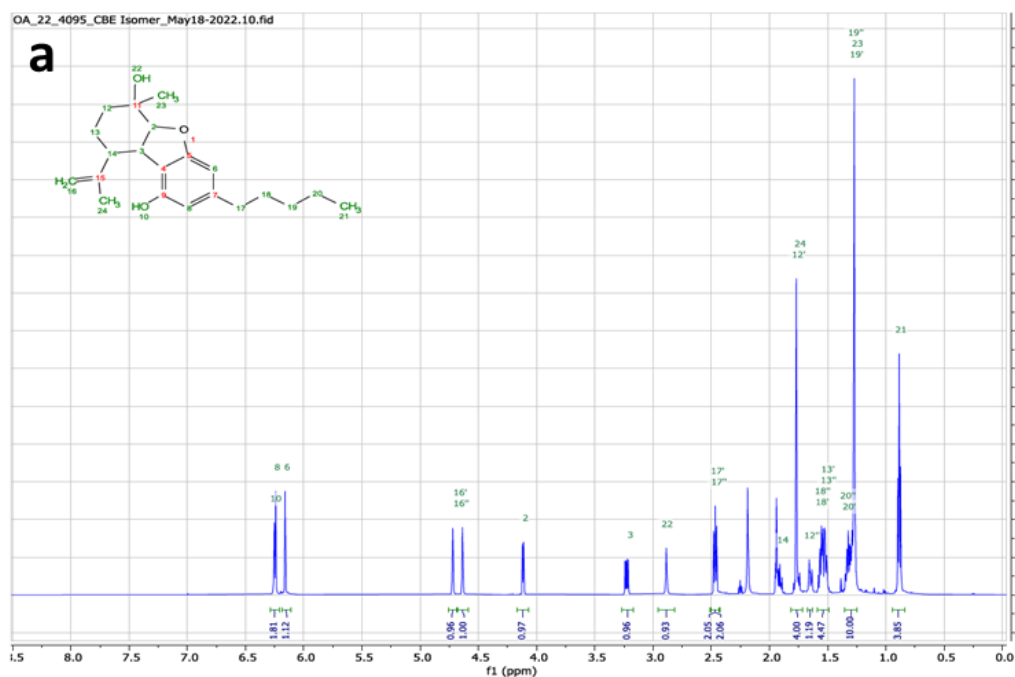

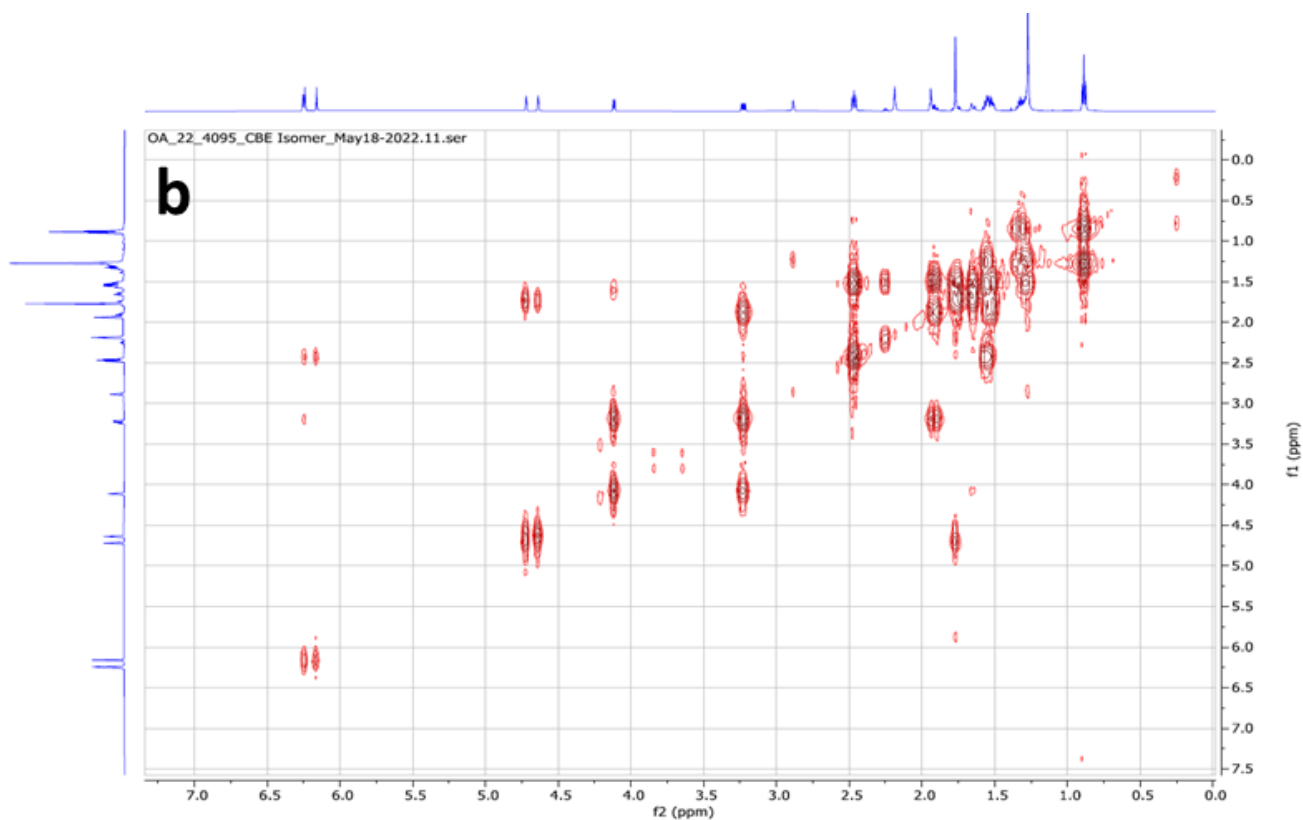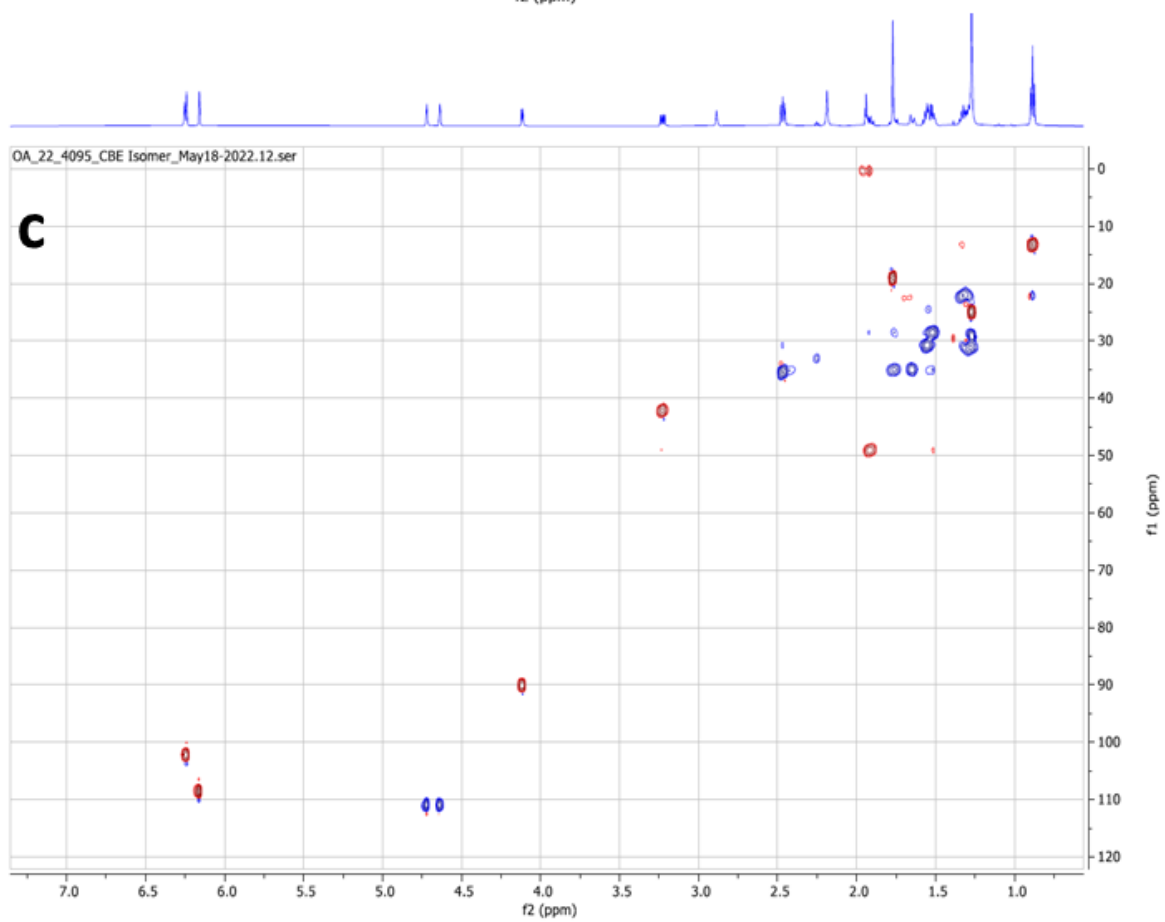

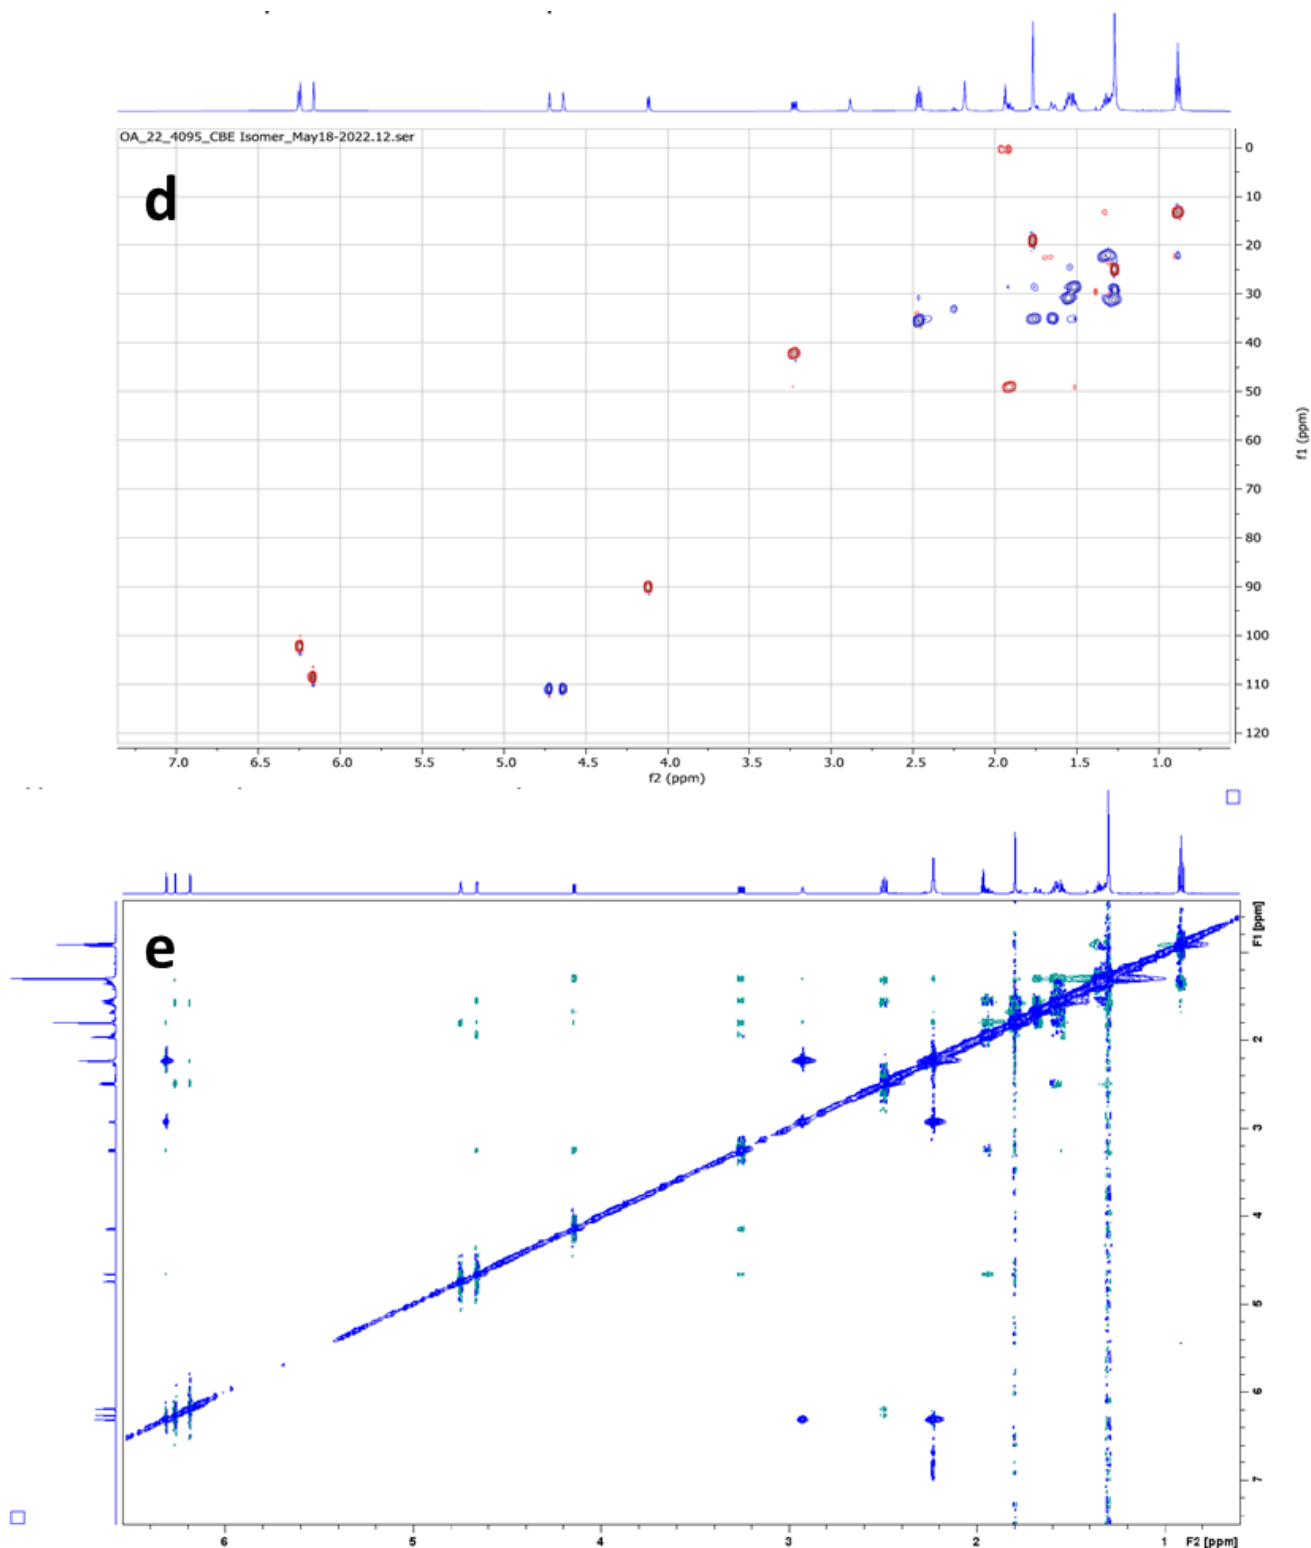

**Figure S6.** NMR analysis of CBE isomer, **a)** <sup>1</sup>H-NMR spectrum in CD<sub>3</sub>CN, **b)** COSY spectrum in CD<sub>3</sub>CN, **c)** HSQC spectrum in CD<sub>3</sub>CN, **d)** HMBC spectrum of in CD<sub>3</sub>CN, and **e)** NOESY spectrum in in CD<sub>3</sub>CN.

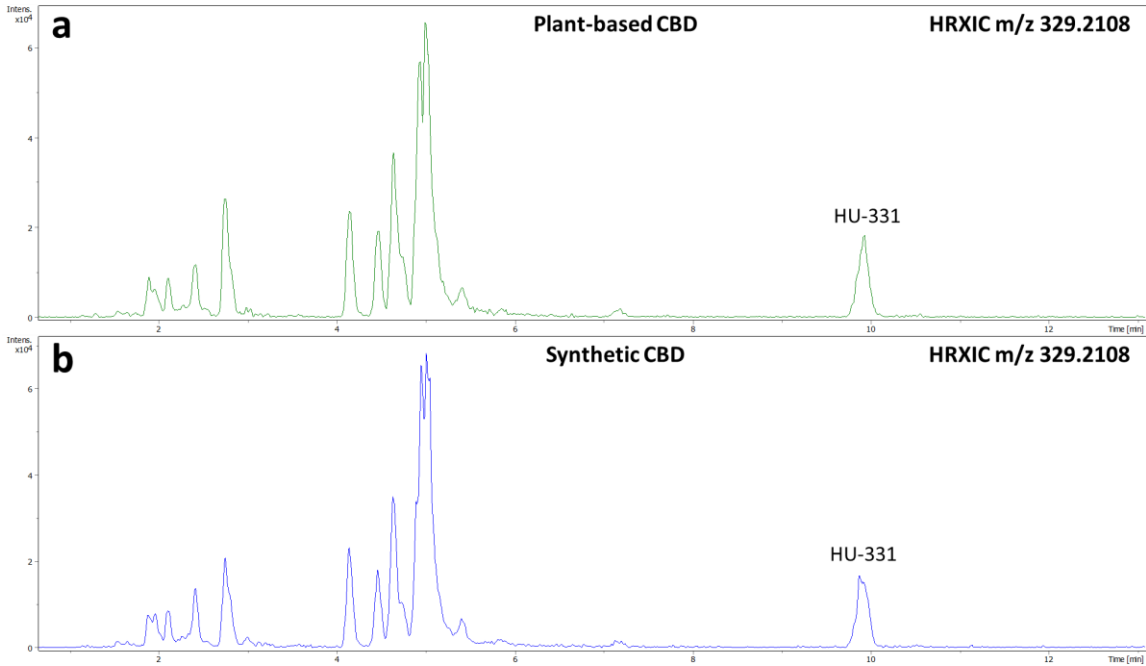

**Figure S7.** HRXIC of  $m/z$  329.2108 ion observed in CBD e-liquid stored for 29 days under stressed conditions. **a)** Plant-based CBD e-liquid formulation; **b)** synthetic CBD e-liquid formulation.

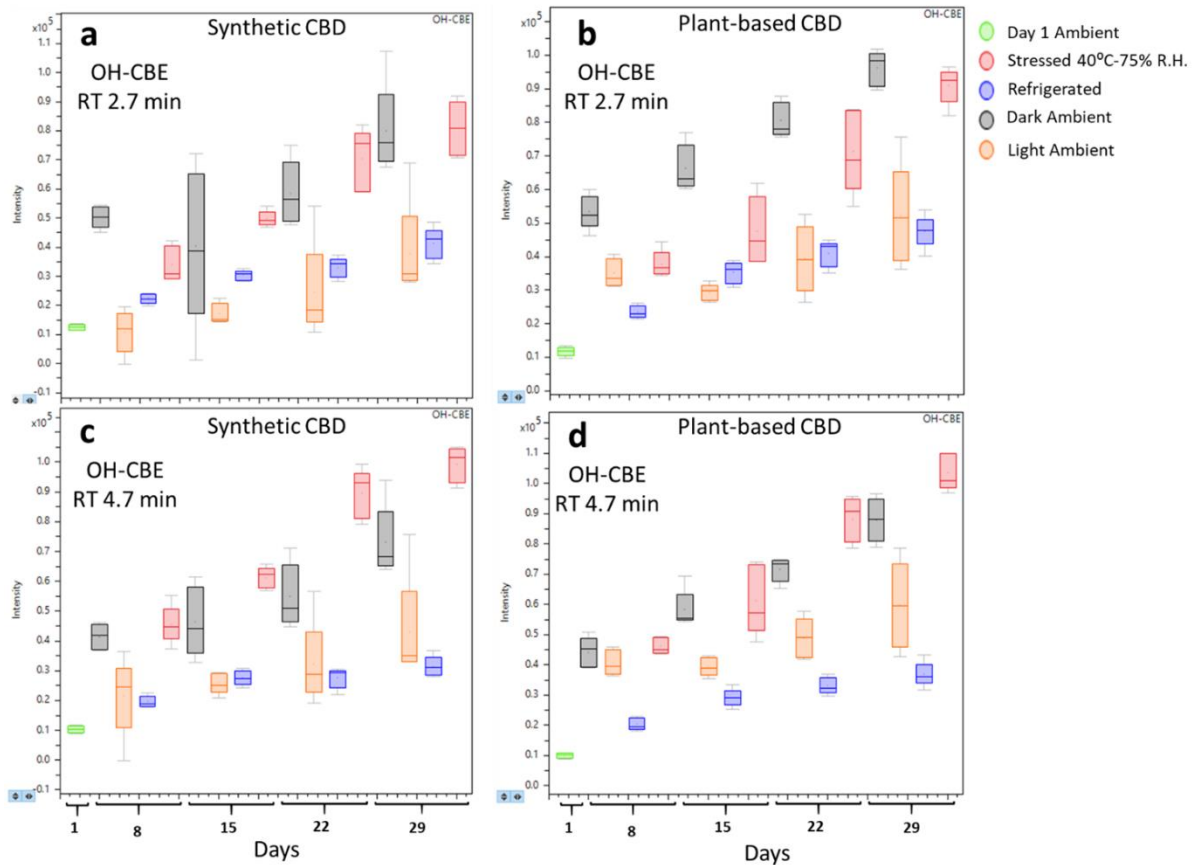

**Figure S8.** Trend in levels of the putative OH-CBE in CBD e-liquid stored for 29 days under four different conditions. **a)** OH-CBE, RT 2.7 min, synthetic CBD e-liquid formulation; **b)** OH-CBE, RT 2.7 min, plant-based CBD e-liquid formulation; **c)** OH-CBE, RT 4.7 min, synthetic CBD e-liquid formulation; **d)** OH-CBE, RT 4.7 min, plant-based CBD e-liquid formulation.

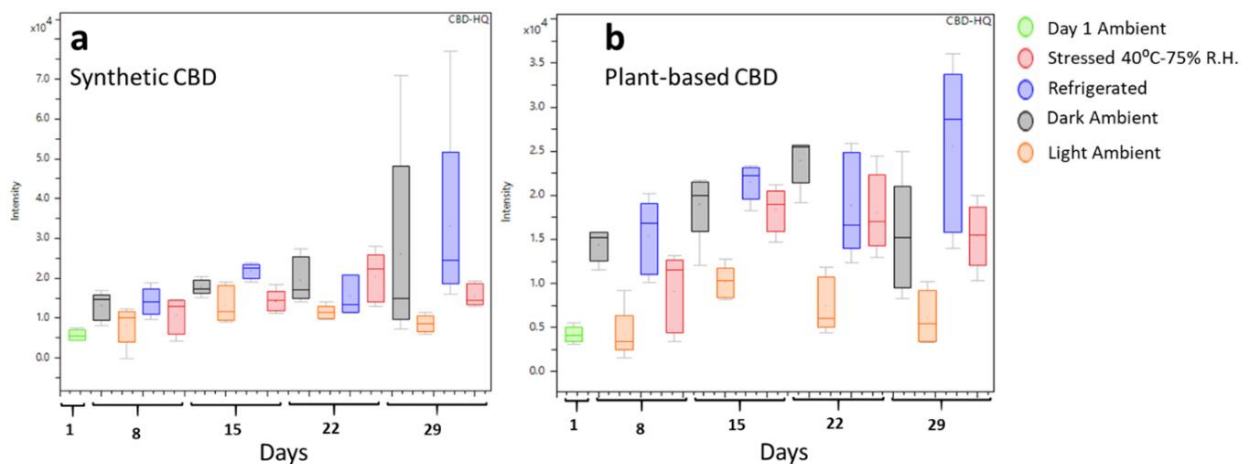

**Figure S9.** Trend in levels of HU-331 in CBD e-liquid stored for 29 days under four different conditions. **a)** HU-331 in synthetic CBD e-liquid formulation; **b)** HU-331 in plant-based CBD e-liquid formulation.

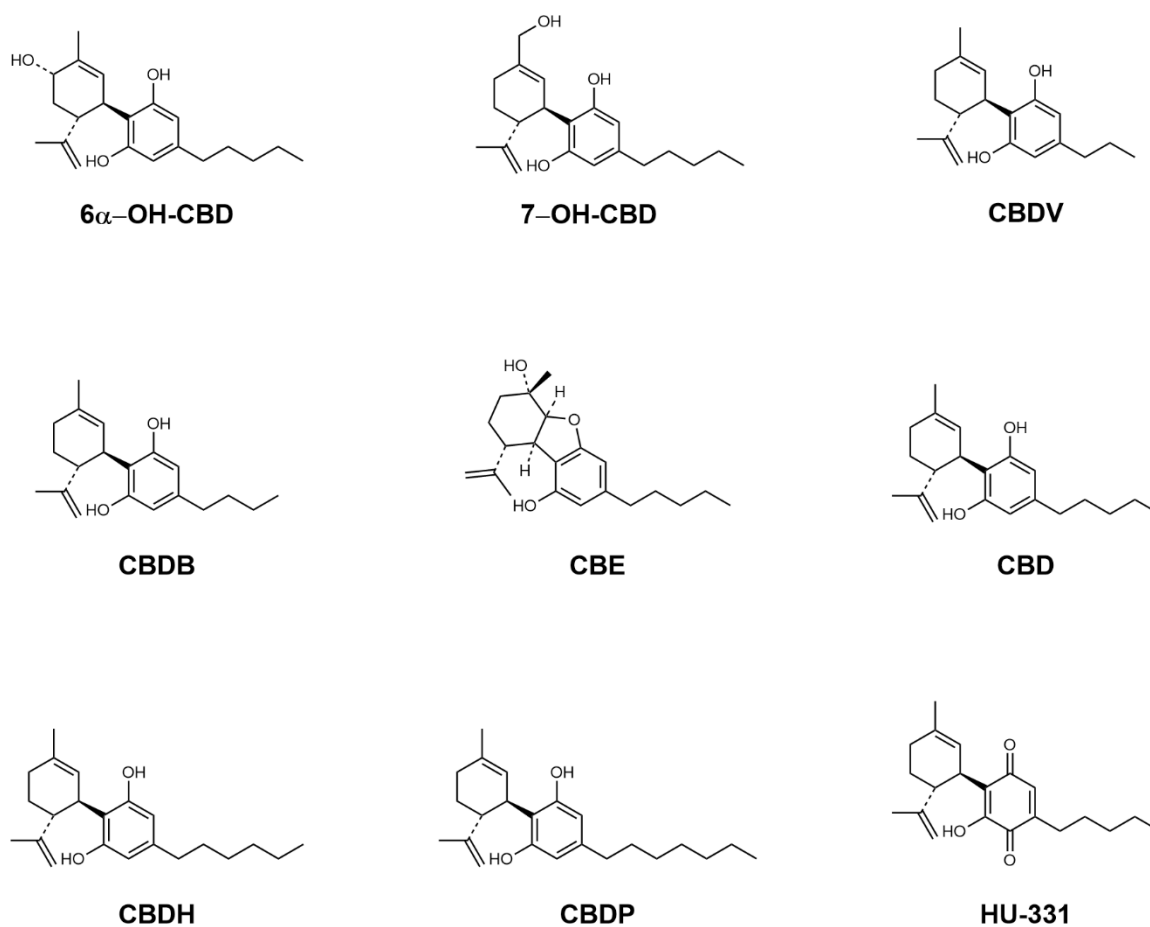

**Figure S10.** Chemical structures of validated cannabinoids.

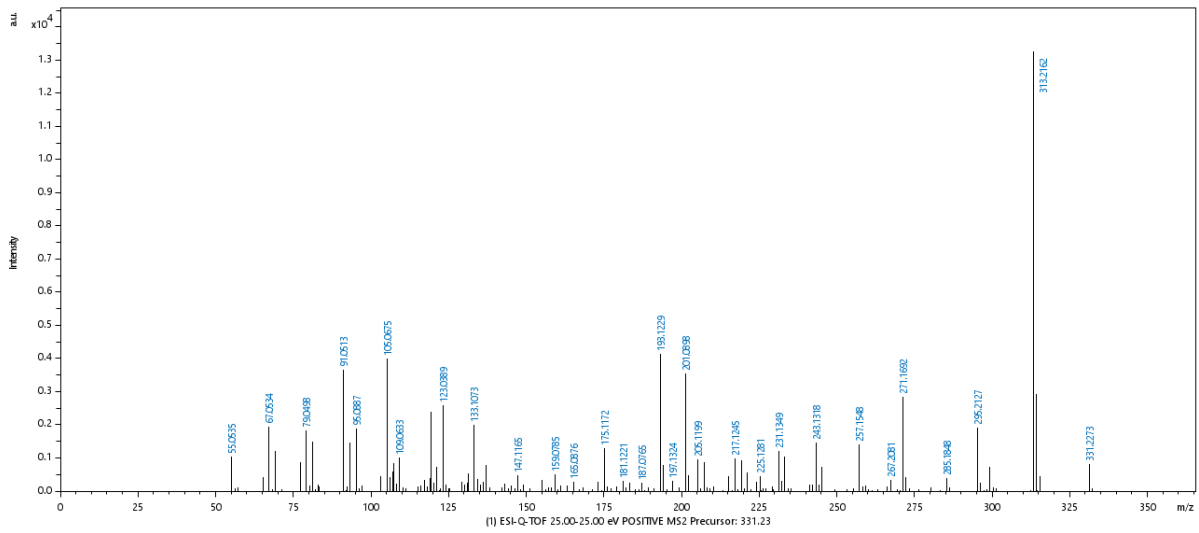

Figure S11. Experimental MS<sup>2</sup> fragmentation pattern of 6α-OH-CBD standard.

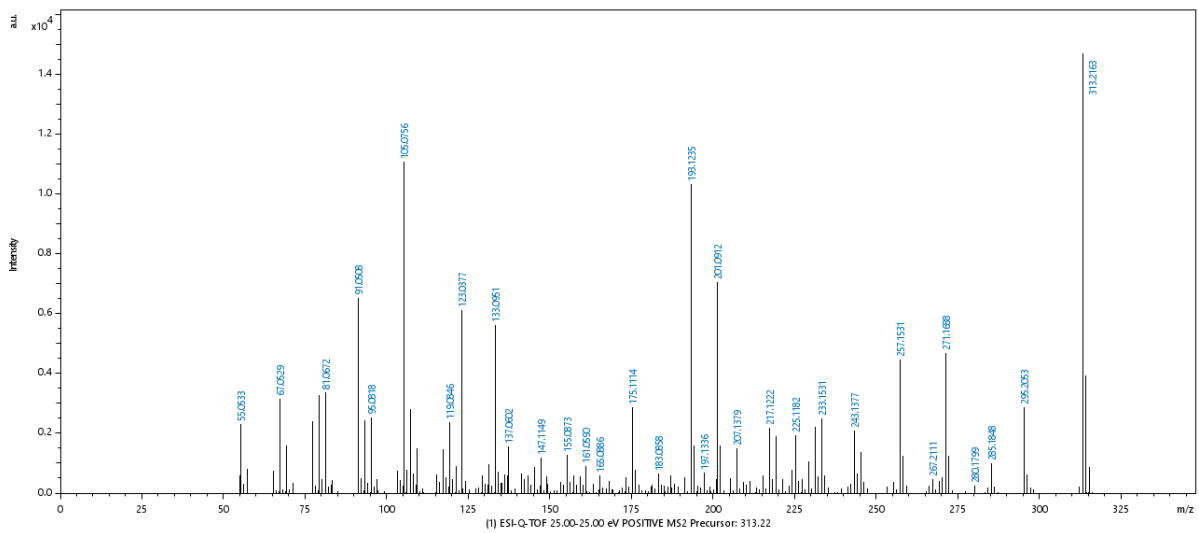

Figure S12. Experimental MS<sup>2</sup> fragmentation pattern of 7-OH-CBD standard.

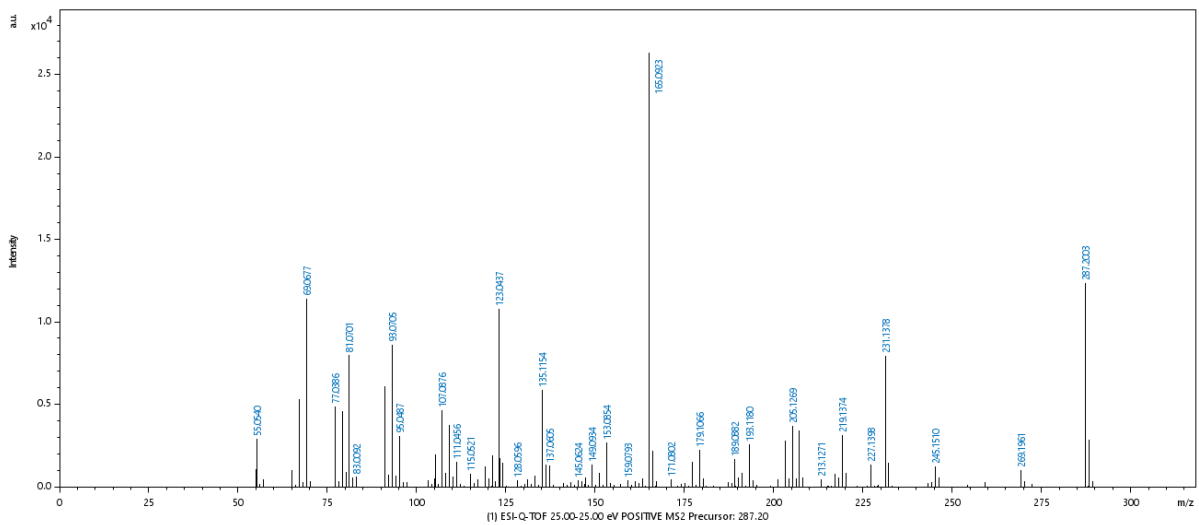

Figure S13. Experimental MS<sup>2</sup> fragmentation pattern of CBDV standard.

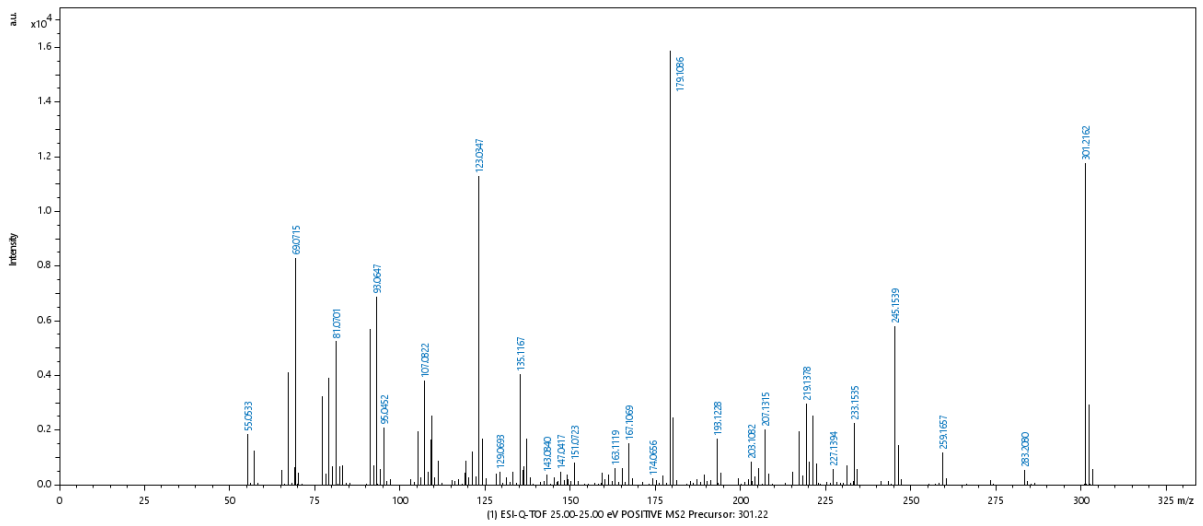

Figure S14. Experimental MS<sup>2</sup> fragmentation pattern of CBDB standard.

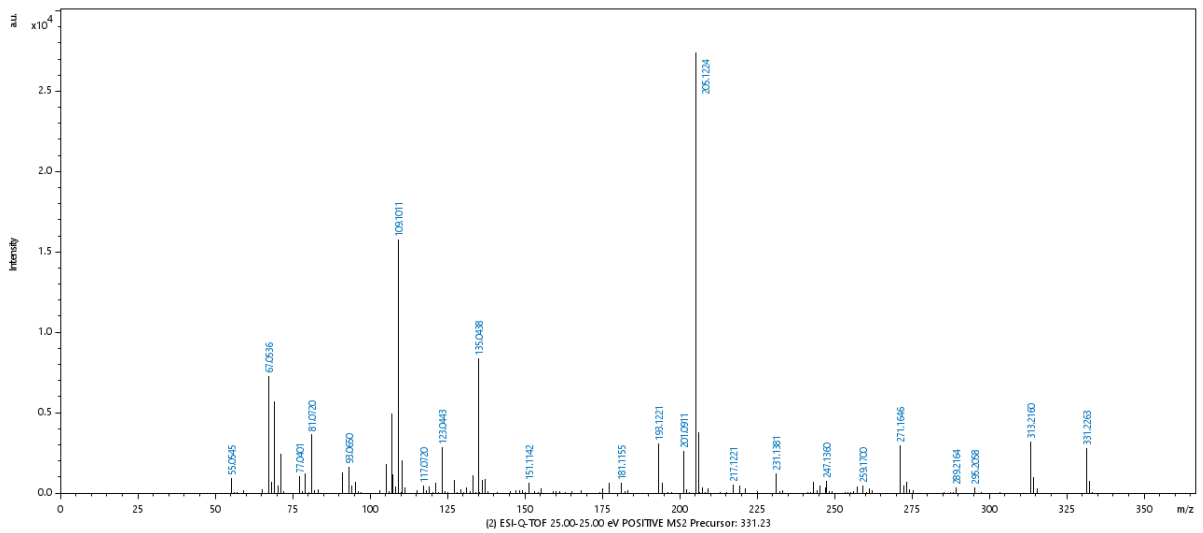

Figure S15. Experimental MS<sup>2</sup> fragmentation pattern of CBE standard.

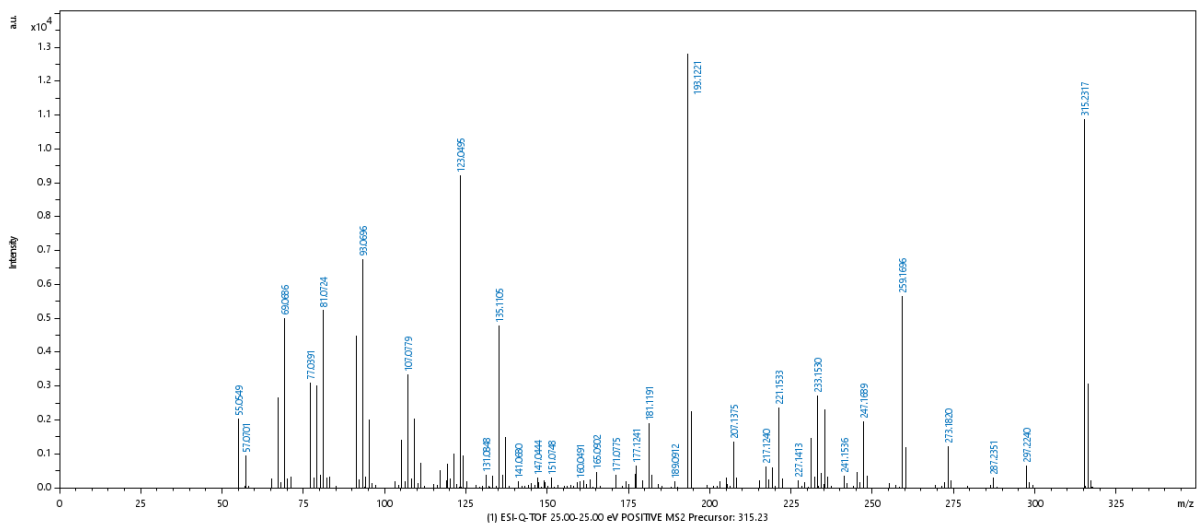

Figure S16. Experimental MS<sup>2</sup> fragmentation pattern of CBD standard.

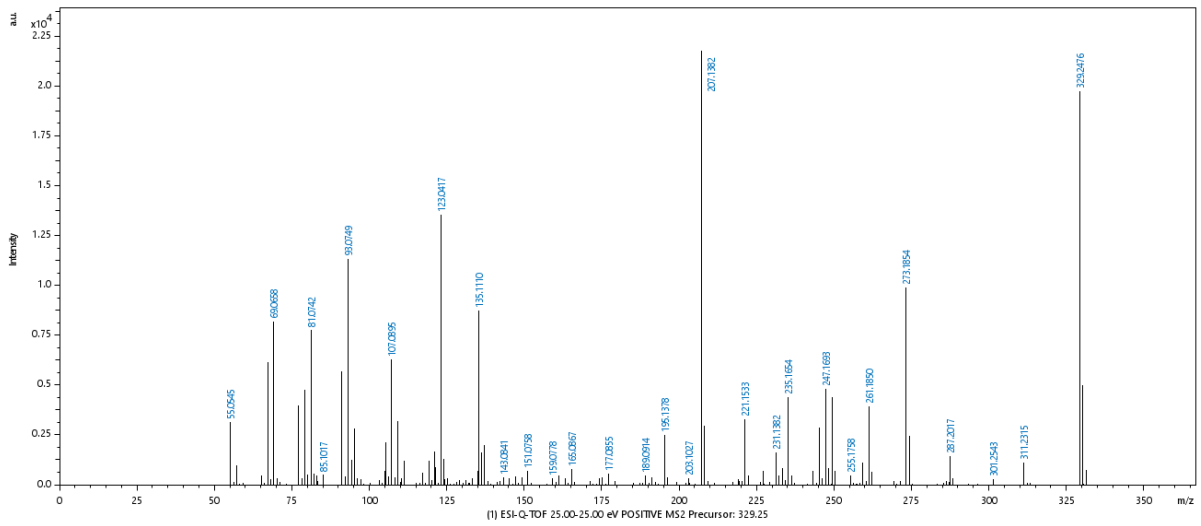

Figure S17. Experimental MS<sup>2</sup> fragmentation pattern of CBDH standard.

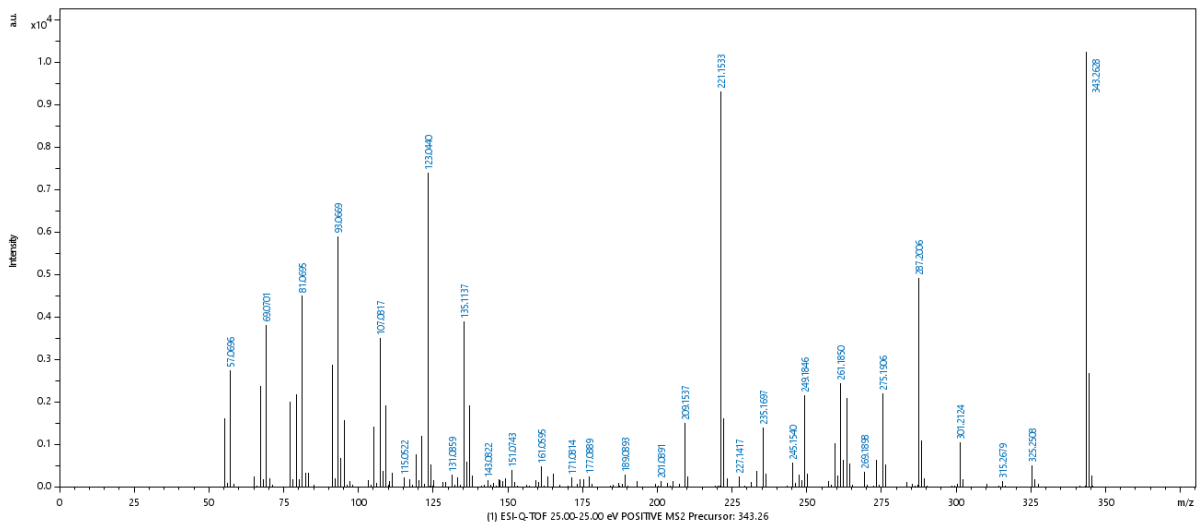

Figure S18. Experimental MS<sup>2</sup> fragmentation pattern of CBDP standard.

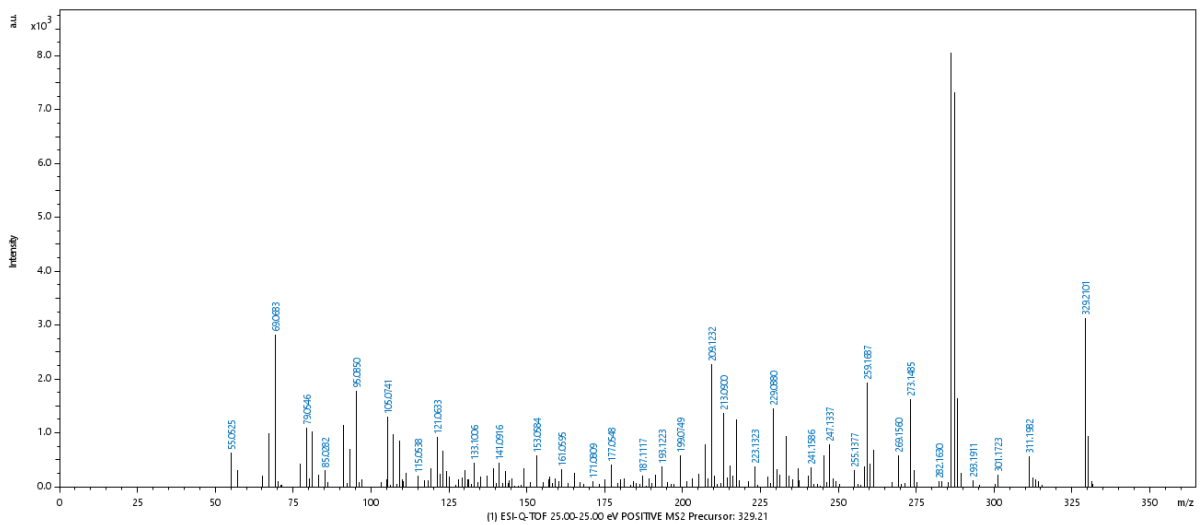

Figure S19. Experimental MS<sup>2</sup> fragmentation pattern of HU-331 standard.

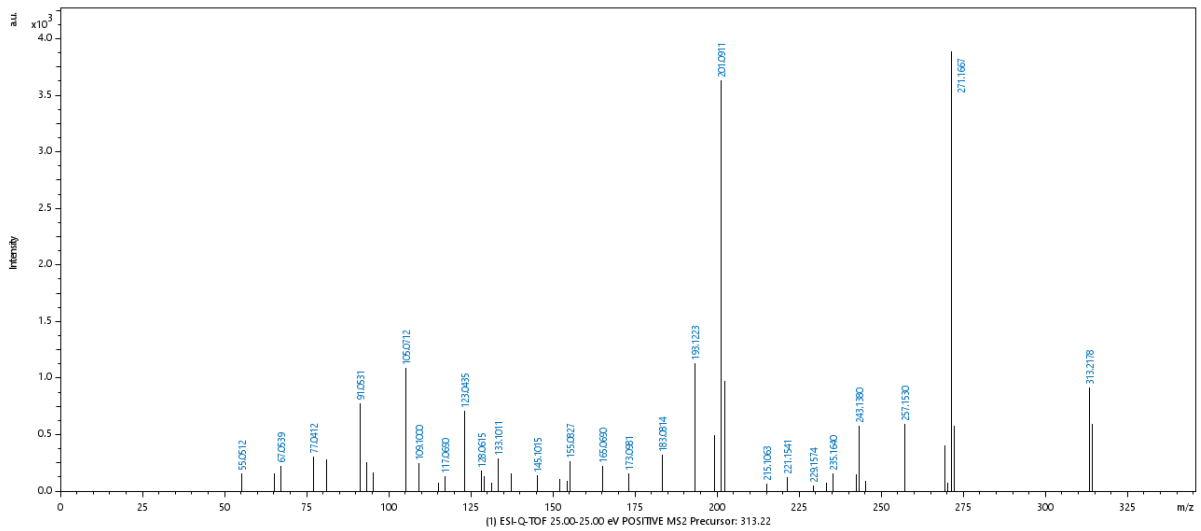

Figure S20. Experimental MS<sup>2</sup> fragmentation pattern of 6α-OH-CBD from CBD e-liquids at 1.84 min.

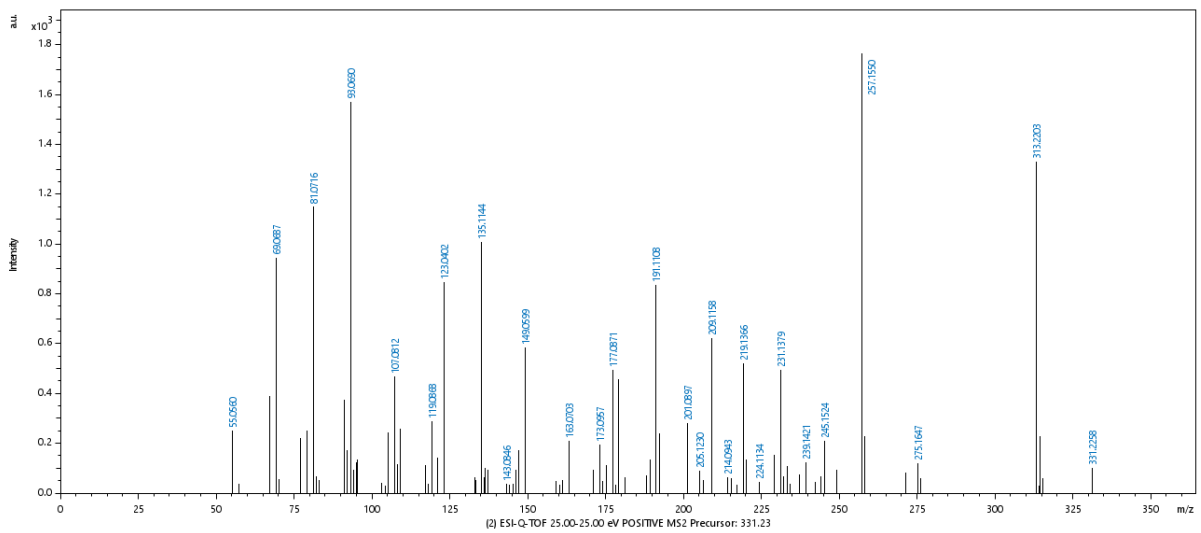

Figure S21. Experimental MS<sup>2</sup> fragmentation pattern of 7-OH-CBD from CBD e-liquids at 2.03 min.

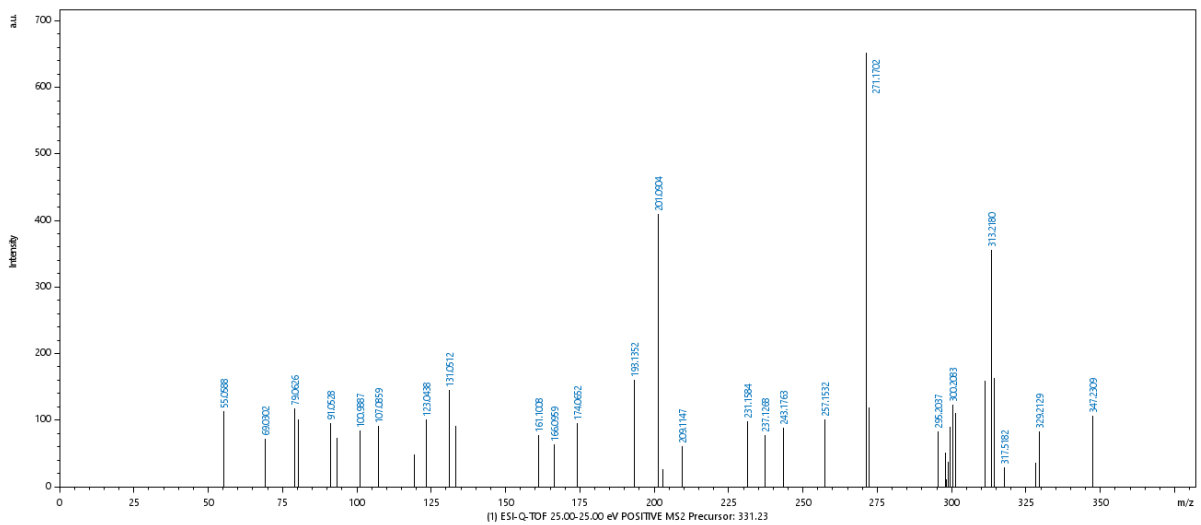

Figure S22. Experimental MS<sup>2</sup> fragmentation pattern of diOH-CBD from CBD e-liquids at 2.13 min.

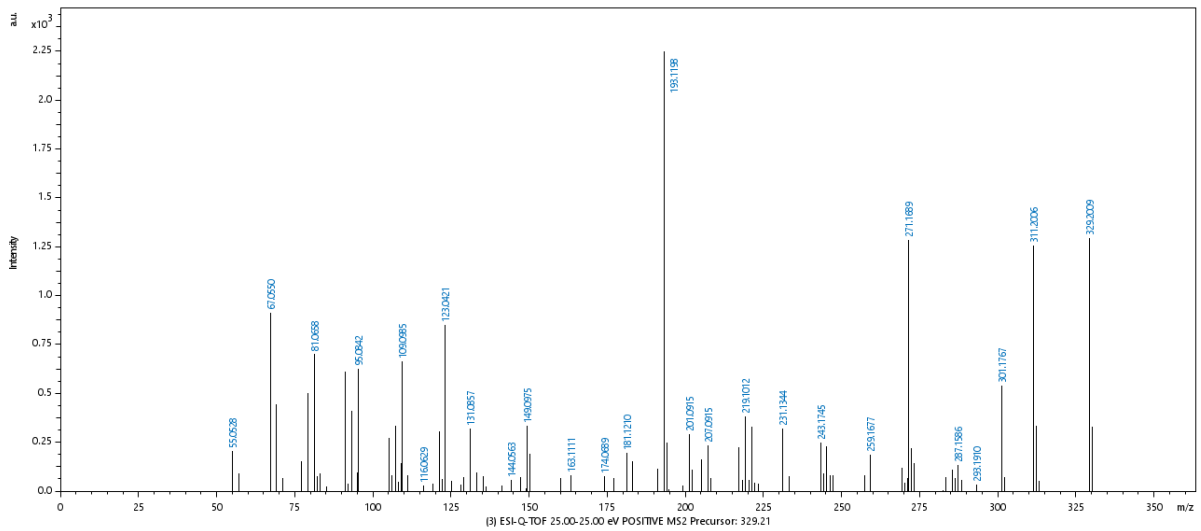

**Figure S23.** Experimental MS<sup>2</sup> fragmentation pattern of HU-331-like from CBD e-liquids at 2.42 min.

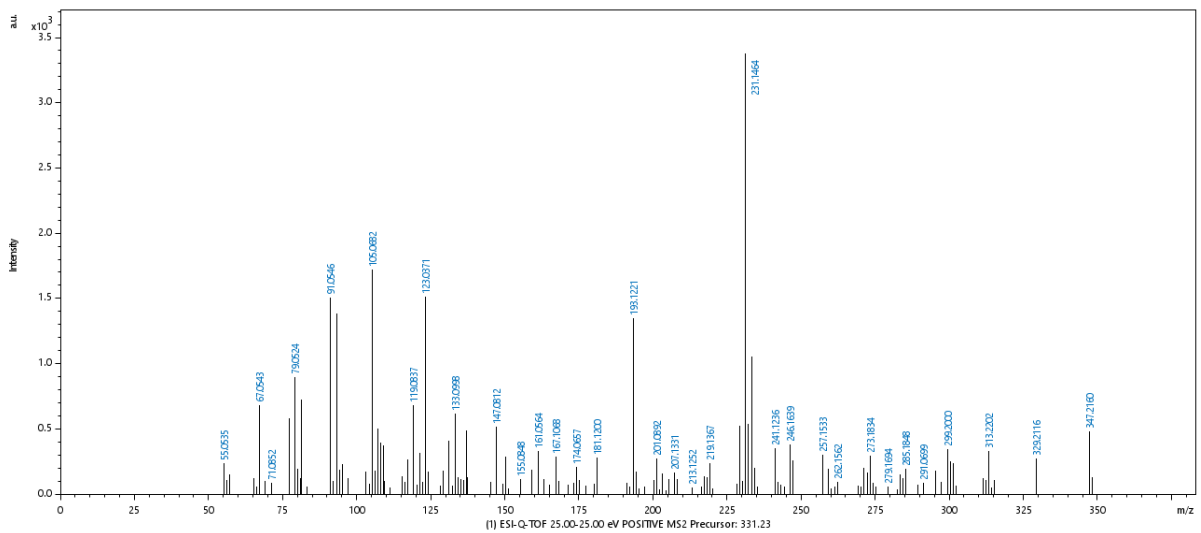

**Figure S24.** Experimental MS<sup>2</sup> fragmentation pattern of diOH-CBD from CBD e-liquids at 2.52 min.

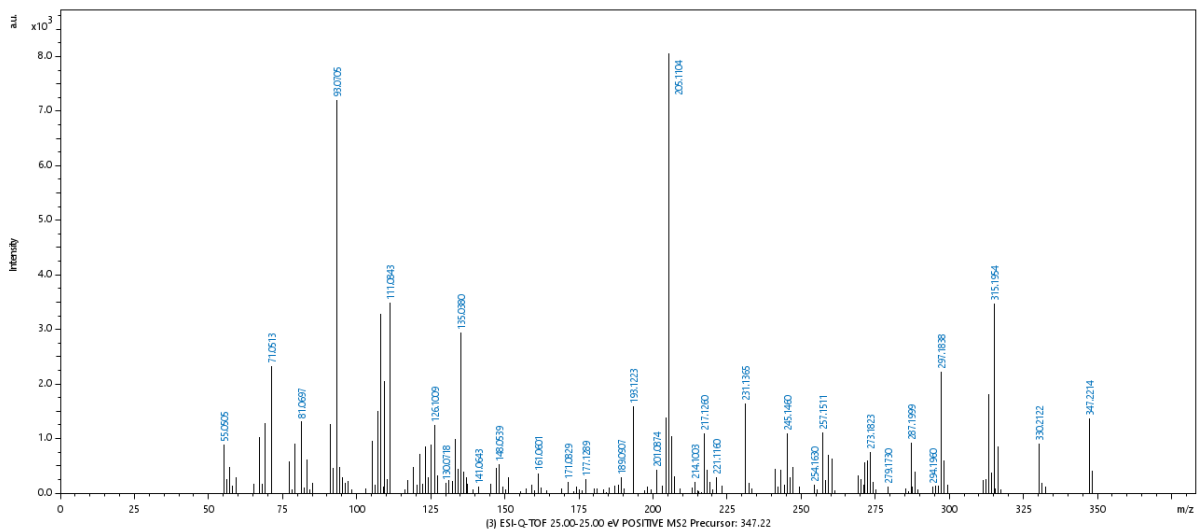

**Figure S25.** Experimental MS<sup>2</sup> fragmentation pattern of OH-CBE from CBD e-liquids at 2.76 min.

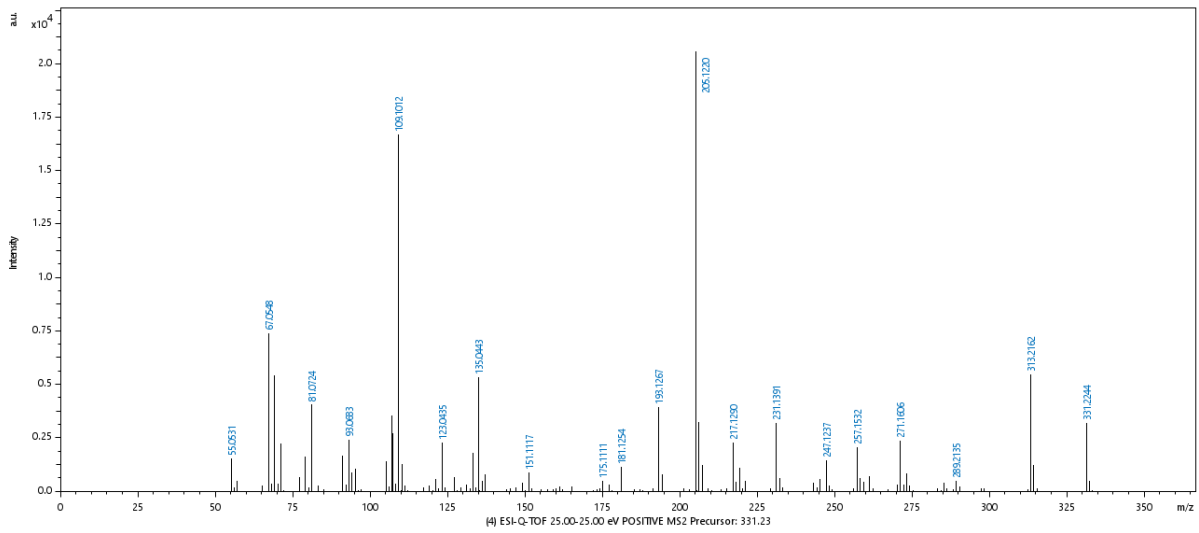

**Figure S26.** Experimental MS<sup>2</sup> fragmentation pattern of CBE isomer from CBD e-liquids at 2.85 min.

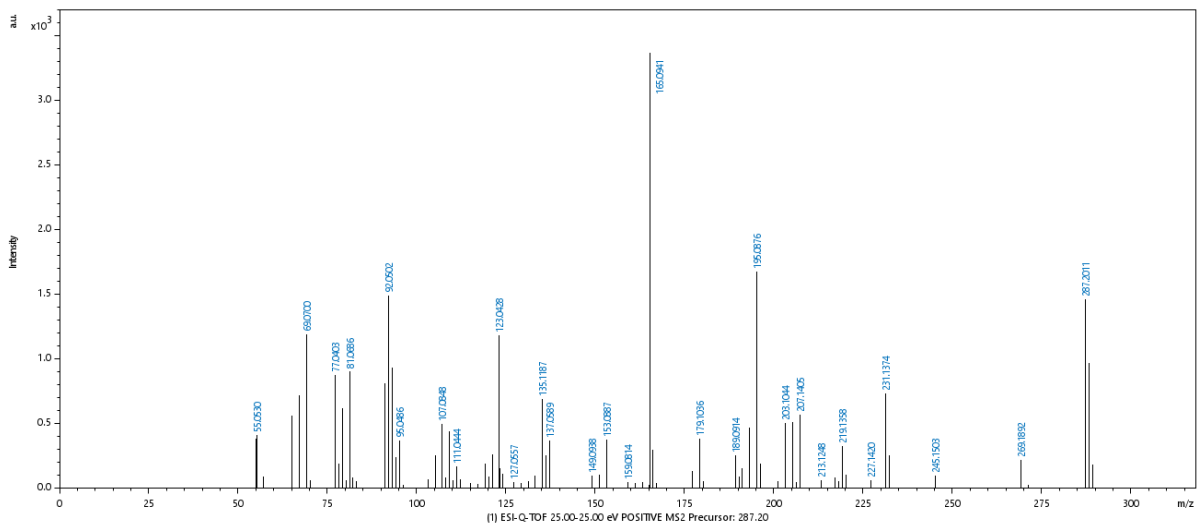

**Figure S27.** Experimental MS<sup>2</sup> fragmentation pattern of CBDV from CBD e-liquids at 3.20 min.

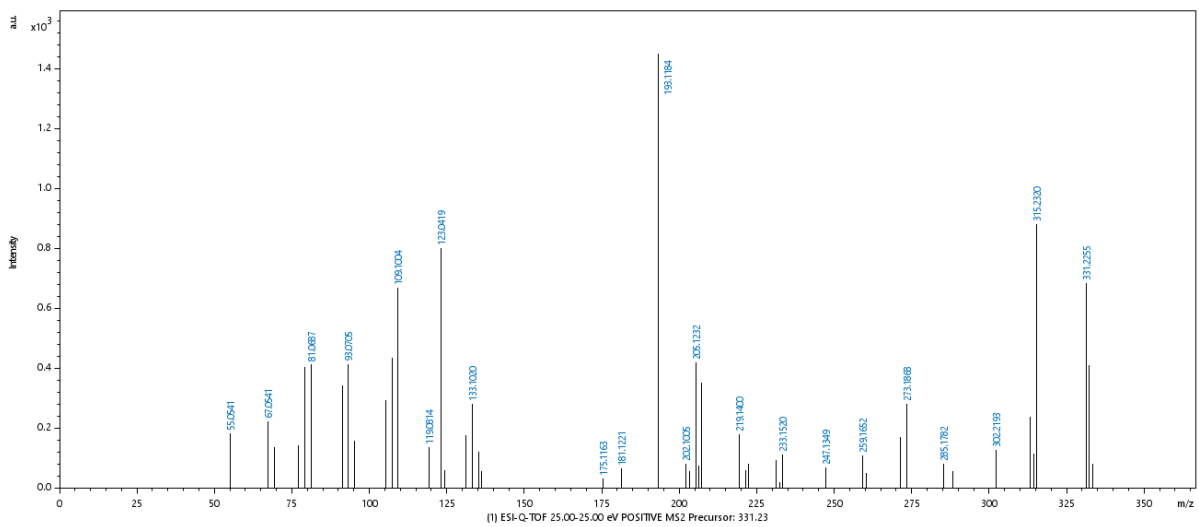

**Figure S28.** Experimental MS<sup>2</sup> fragmentation pattern of OH-CBD from CBD e-liquids at 3.22 min.

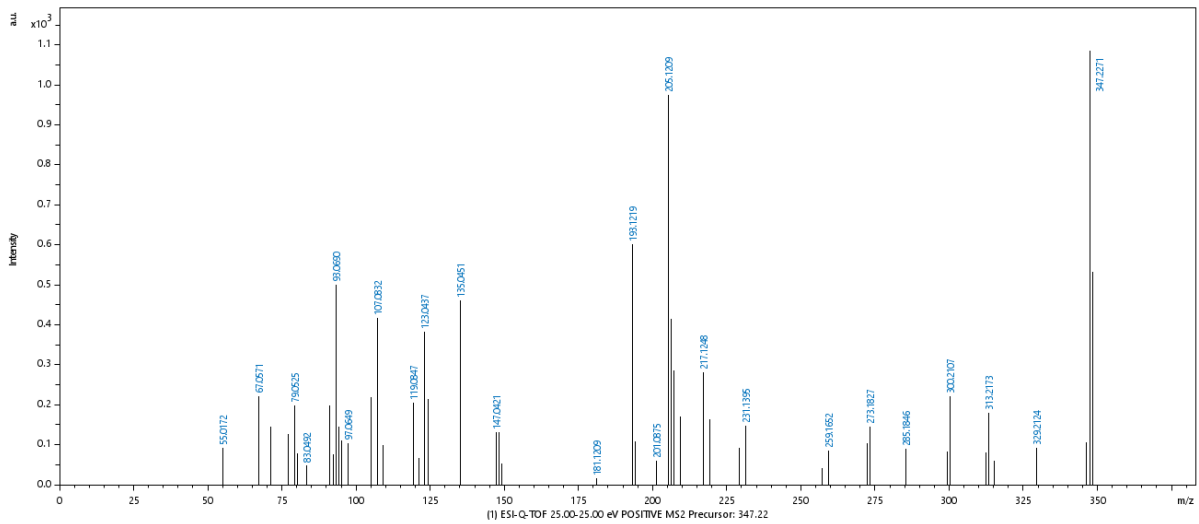

Figure S29. Experimental MS<sup>2</sup> fragmentation pattern of OH-CBE from CBD e-liquids at 3.61 min.

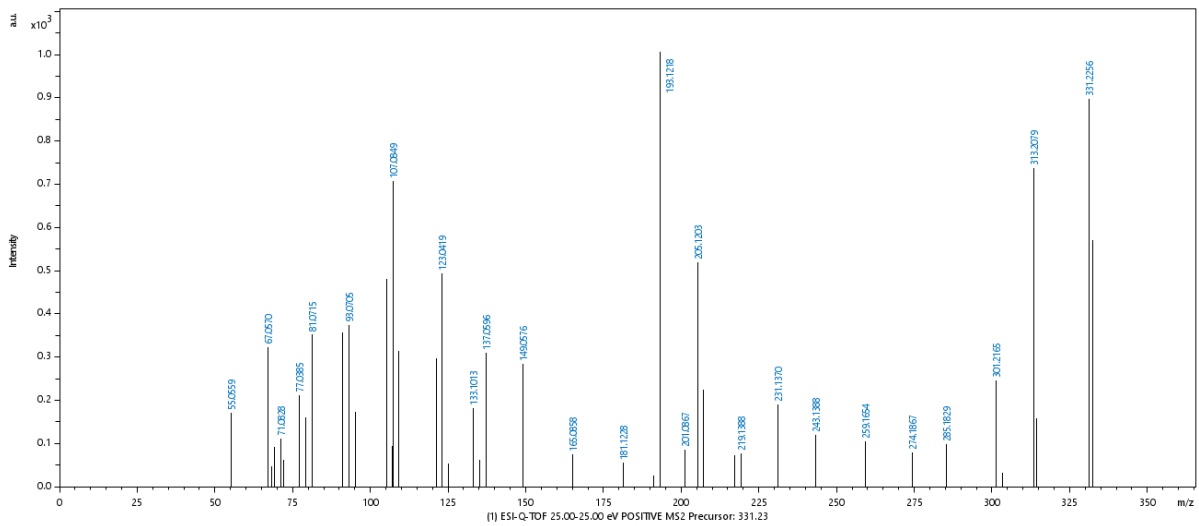

Figure S30. Experimental MS<sup>2</sup> fragmentation pattern of OH-CBD from CBD e-liquids at 3.67 min.

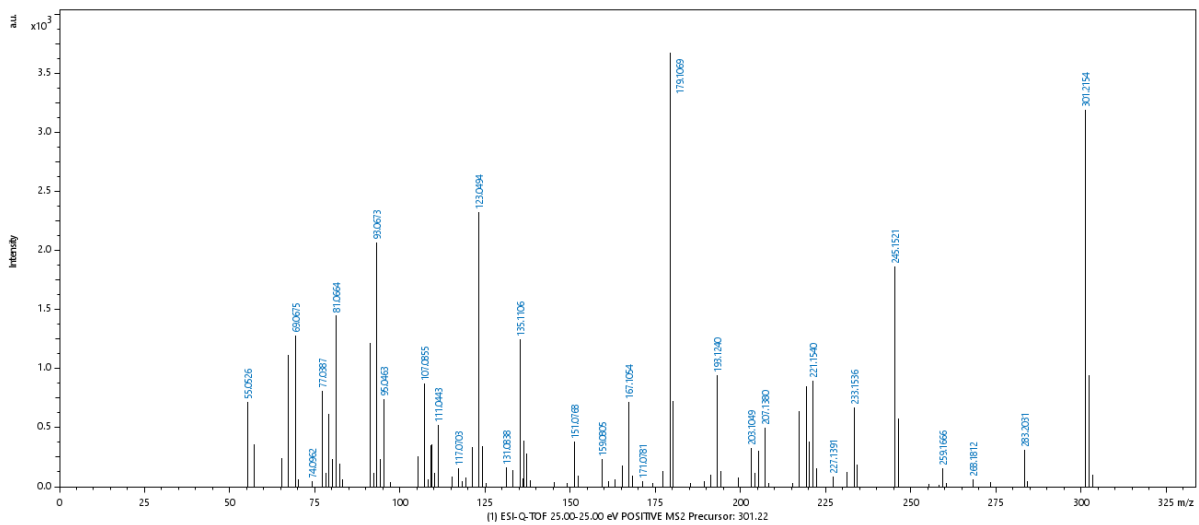

Figure S31. Experimental MS<sup>2</sup> fragmentation pattern of CBD from CBD e-liquids at 3.92 min.

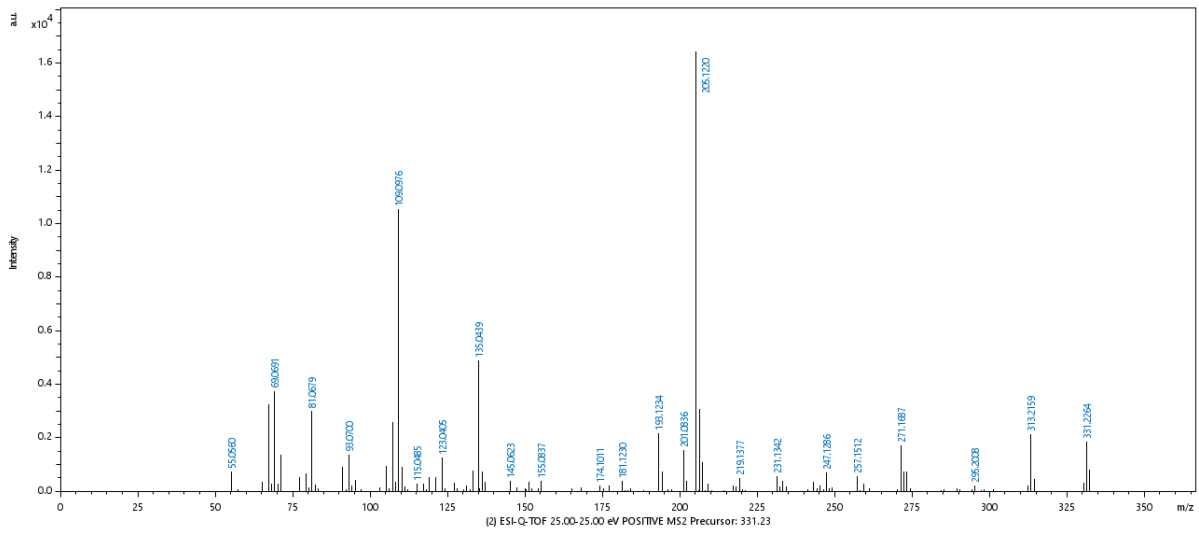

**Figure S32.** Experimental MS<sup>2</sup> fragmentation pattern of CBE from CBD e-liquids at 4.17 min.

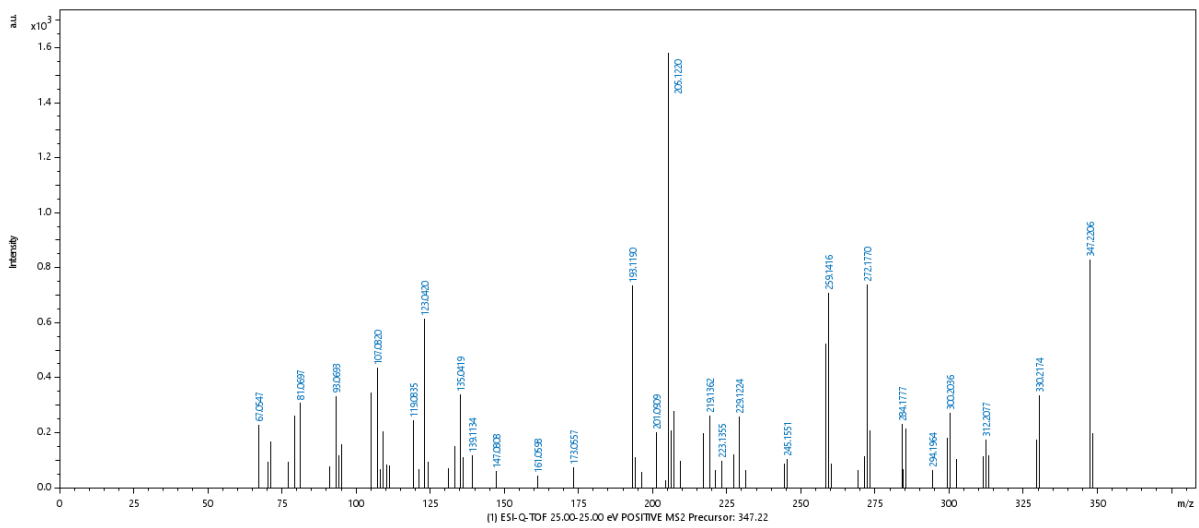

**Figure S33.** Experimental MS<sup>2</sup> fragmentation pattern of OH-CBE from CBD e-liquids at 4.21 min.

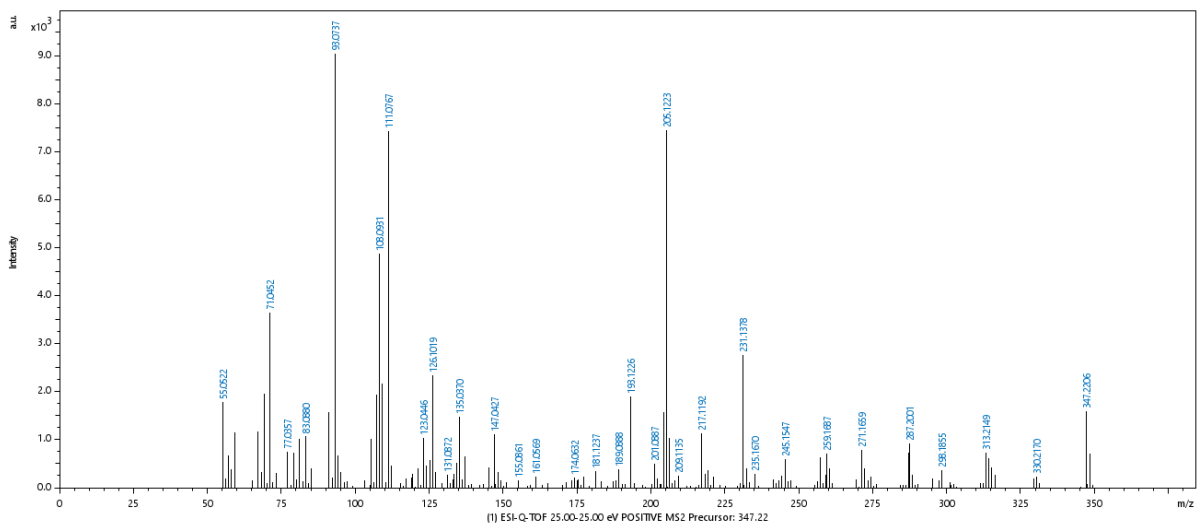

**Figure S34.** Experimental MS<sup>2</sup> fragmentation pattern of OH-CBE from CBD e-liquids at 4.75 min.

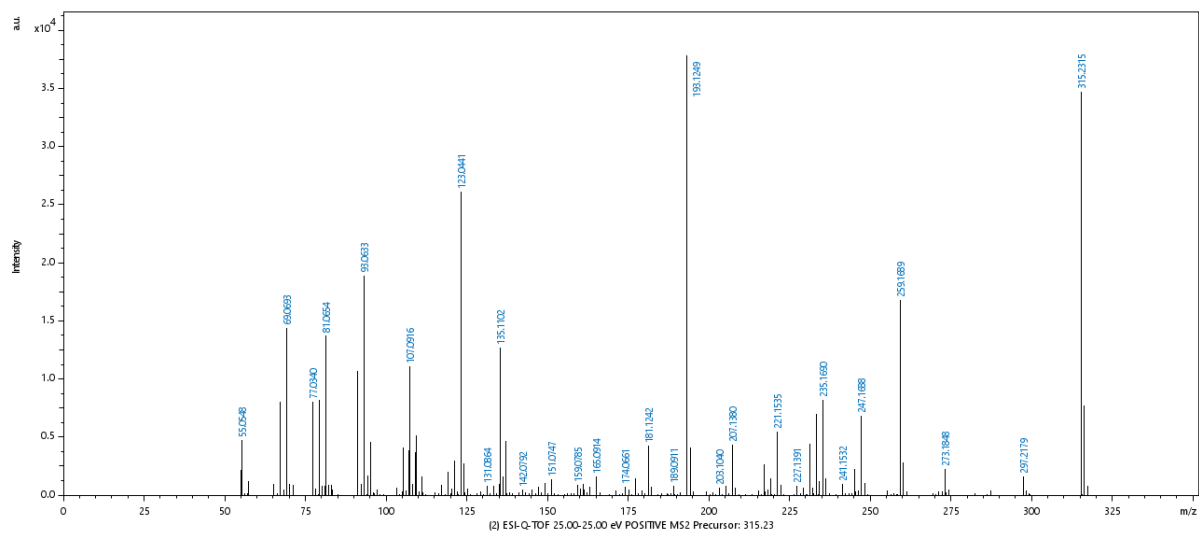

Figure S35. Experimental MS<sup>2</sup> fragmentation pattern of CBD from CBD e-liquids at 4.99 min.

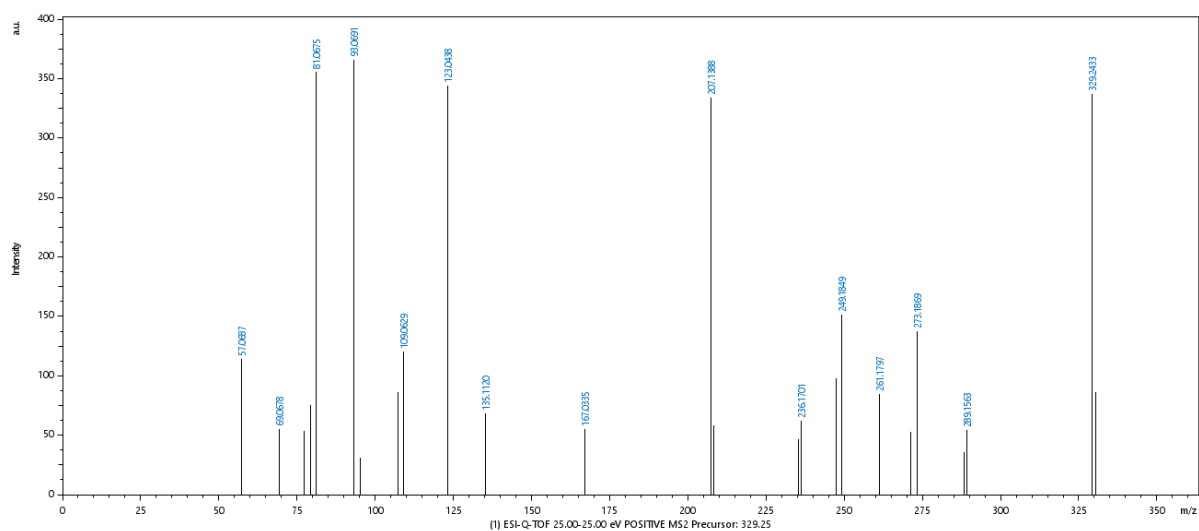

Figure S36. Experimental MS<sup>2</sup> fragmentation pattern of CBDH from CBD e-liquids at 6.56 min.

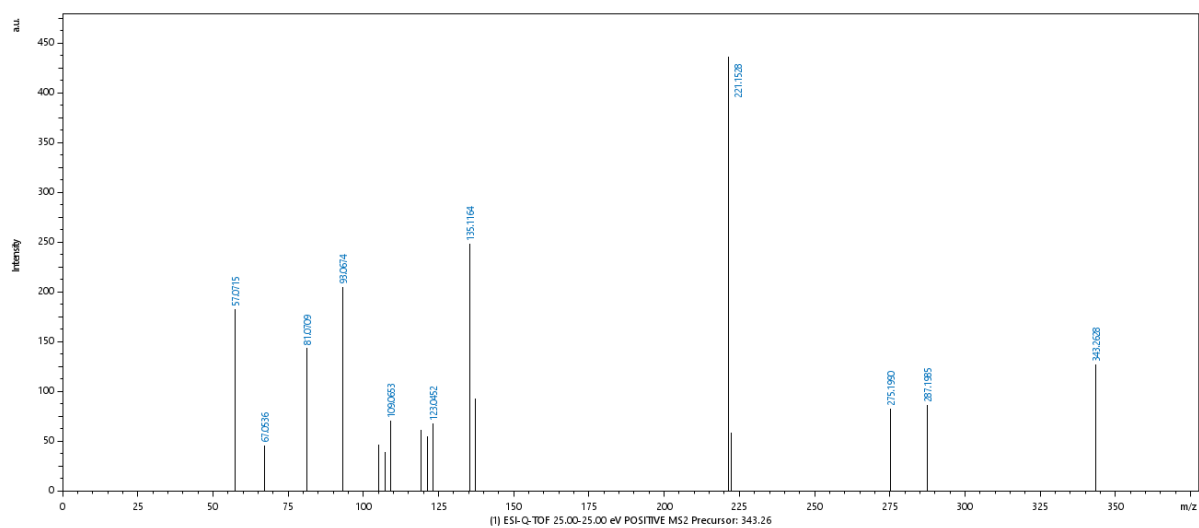

Figure S37. Experimental MS<sup>2</sup> fragmentation pattern of CBDP from CBD e-liquids at 8.95 min.

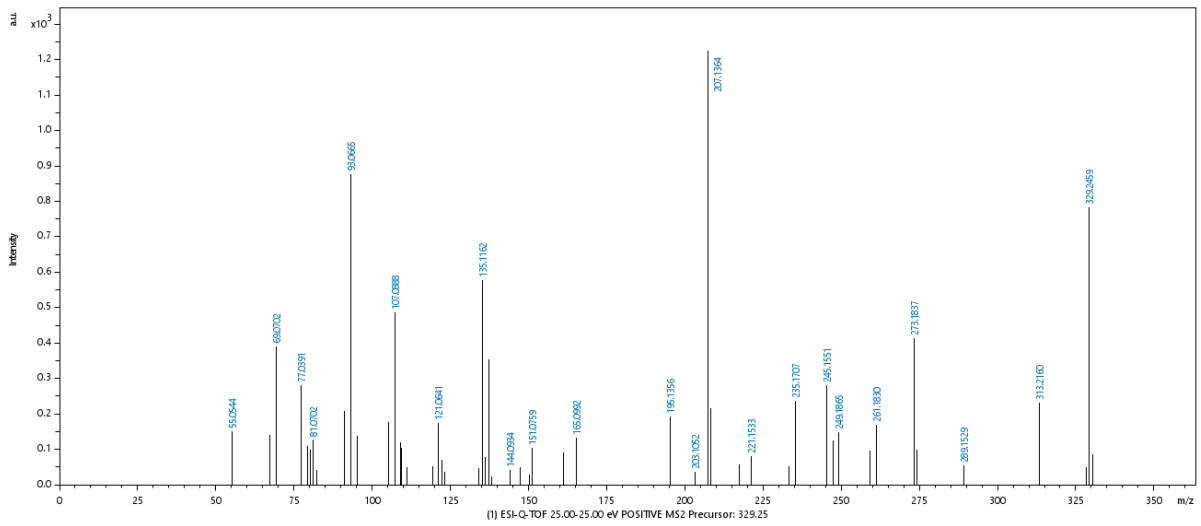

**Figure S38.** Experimental MS<sup>2</sup> fragmentation pattern of CBDH isomer from CBD e-liquids at 9.65 min.

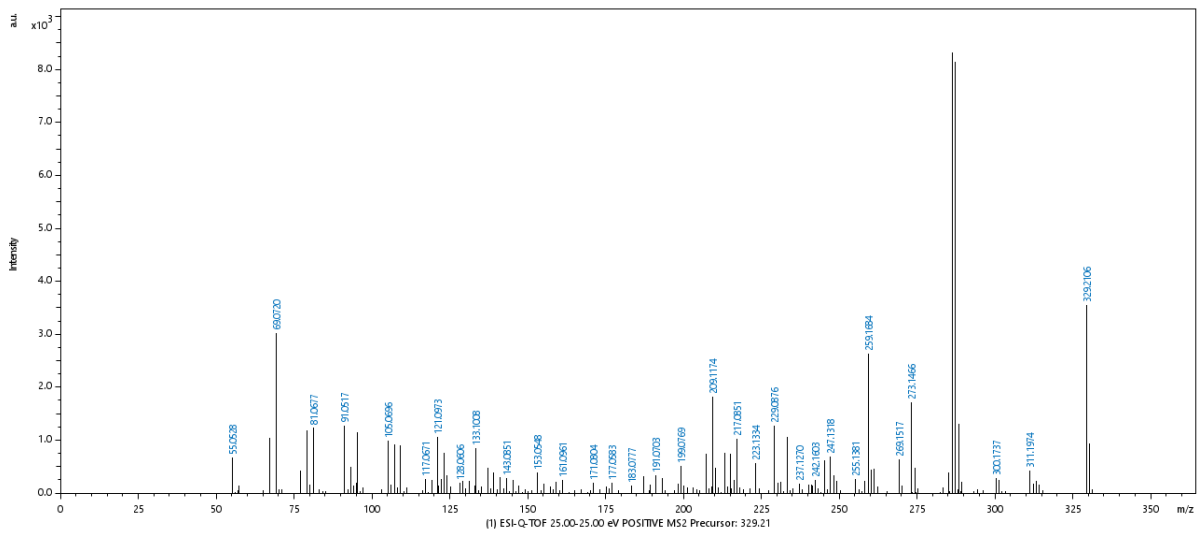

**Figure S39.** Experimental MS<sup>2</sup> fragmentation pattern of HU-331 from CBD e-liquids at 9.92 min.
